1 **Penicillin Binding Protein Substitutions Co-occur with Fluoroquinolone Resistance in**  
2 **‘Epidemic’ Lineages of Multi Drug-Resistant *Clostridioides difficile***

3

4 Kate E. Dingle,<sup>a,b,#</sup> Jane Freeman,<sup>c,d</sup> Xavier Didelot,<sup>e</sup> David W. Eyre,<sup>b,f</sup> Jeremy Swan,<sup>a,b</sup>  
5 William D. Spittal,<sup>c,d</sup> Emma V. Clark,<sup>c,d</sup> Keith A. Jolley,<sup>g</sup> A. Sarah Walker,<sup>a,b</sup> Mark H.  
6 Wilcox,<sup>c,d</sup> Derrick W. Crook<sup>a,b</sup>

7

8 <sup>a</sup>Nuffield Department of Clinical Medicine, John Radcliffe Hospital, Oxford University, UK

9 <sup>b</sup>National Institute for Health Research (NIHR) Oxford Biomedical Research Centre, John  
10 Radcliffe Hospital, Oxford, UK

11 <sup>c</sup>Department of Microbiology, Leeds Teaching Hospitals Trust, Leeds, UK.

12 <sup>d</sup>Healthcare Associated Infections Research Group, The Leeds Institute of Medical Research,  
13 University of Leeds, Leeds, UK.

14 <sup>e</sup>School of Life Sciences and Department of Statistics, University of Warwick, UK.

15 <sup>f</sup>Big Data Institute, Nuffield Department of Population Health, Oxford University of Oxford,  
16 Oxford, UK.

17 <sup>g</sup>Department of Zoology, University of Oxford, Oxford, UK.

18

19 Running Head: Penicillin Binding Proteins of Epidemic *C. difficile*

20

21 #Address correspondence to Kate E. Dingle, [kate.dingle@ndm.ox.ac.uk](mailto:kate.dingle@ndm.ox.ac.uk)

22 **ABSTRACT**

23 *Clostridioides difficile* remains a key cause of healthcare-associated infection, with multi-  
24 drug-resistant (MDR) lineages causing high mortality ( $\geq 20\%$ ) outbreaks. Cephalosporin  
25 treatment is a long-established risk factor, and antimicrobial stewardship a key control. A  
26 mechanism underlying raised cephalosporin MICs has not been identified in *C. difficile*, but  
27 among other species resistance is often acquired *via* amino acid substitutions in cell wall  
28 transpeptidases (penicillin binding proteins, PBPs). Here, we investigated five *C. difficile*  
29 transpeptidases (PBP1-5) for recent substitutions. Previously published genome assemblies  
30 (n=7096) were obtained, representing sixteen geographically widespread lineages, including  
31 healthcare-associated MDR ST1(027), ST3(001) and ST17(018). Recent amino acid  
32 substitutions were found within PBP1 (n=50) and PBP3 (n=48), ranging from 1-10  
33 substitutions per genome.  $\beta$ -lactam MICs were measured for closely related pairs of wild-  
34 type and PBP substituted isolates separated by 20-273 SNPs. Recombination-corrected, dated  
35 phylogenies were constructed to date substitution acquisition. Key substitutions such as PBP3  
36 V497L and PBP1 T674I/N/V emerged independently across multiple lineages. They were  
37 associated with extremely high cephalosporin MICs; 1-4 doubling dilutions >wild-type up to  
38  $\leq 1506\mu\text{g/ml}$ . Substitution patterns varied by lineage and clade, showed geographic structure,  
39 and notably occurred post-1990, coincident with the acquisition of *gyrA/B* substitutions  
40 conferring fluoroquinolone resistance. In conclusion, recent PBP1 and PBP3 substitutions are  
41 associated with raised cephalosporin MICs in *C. difficile*. The co-occurrence of resistance to  
42 cephalosporins and fluoroquinolones hinders attempts to understand their relative importance  
43 in the dissemination of epidemic lineages. Further controlled studies of cephalosporin and  
44 fluoroquinolone stewardship are needed to determine their relative effectiveness in outbreak  
45 control.

46

47 **IMPORTANCE**

48 Fluoroquinolone and cephalosporin prescribing in healthcare settings have triggered  
49 outbreaks of high-mortality, multi-drug resistant *C. difficile* infection. Here, we identify a  
50 mechanism of acquired cephalosporin resistance in *C. difficile*, comprising amino acid  
51 substitutions in two cell-wall transpeptidase enzymes (penicillin binding proteins). The  
52 higher the number of substitutions, the greater the impact on phenotype. Dated phylogenies  
53 revealed that resistance to both cephalosporins and fluoroquinolones was co-acquired  
54 immediately before clinically important, outbreak strains emerged. PBP substitutions were  
55 geographically structured within genetic lineages, suggesting adaptation to local  
56 antimicrobial prescribing. Antimicrobial stewardship of cephalosporins and fluoroquinolones  
57 is an effective means of *C. difficile* outbreak control. Genetic changes conferring resistance  
58 likely impart a ‘fitness-cost’ after antibiotic withdrawal. Our study identifies a mechanism  
59 that may explain the contribution of cephalosporin stewardship to resolving outbreak  
60 conditions. However, due to the co-occurrence of cephalosporin and fluoroquinolone  
61 resistance, further work is needed to determine the relative importance of each.

62 **INTRODUCTION**

63 *Clostridioides difficile* is among the leading causes of healthcare-associated infection,  
64 symptoms ranging from diarrhoea to potentially fatal pseudomembranous colitis (1). Over the  
65 last 30 years, unrestricted antimicrobial use has selected multidrug resistant (MDR) *C.*  
66 *difficile* lineages, which can be identified by multilocus sequence type (ST) and/or PCR-  
67 ribotype (2-9). Uncontrolled prescribing of antimicrobials such as fluoroquinolones and  
68 cephalosporins, which are associated with a high risk of *C. difficile* infection (CDI), creates  
69 conditions under which MDR lineages can cause persistent, high-mortality ( $\geq 20\%$ ) outbreaks  
70 (9-18). Such healthcare-associated transmission may be geographically widespread as in the  
71 ‘hypervirulent’ ST1(ribotype 027) lineage FQ-R1 (19), and/or prolonged, as in ST17(018),  
72 predominating in Japanese and Italian healthcare settings since the 1990s (17, 20). Cases  
73 associated with the rapid transmission of MDR lineages are typically superimposed over a  
74 background of sporadic, unlinked cases caused by *C. difficile* strains, which lack acquired  
75 antimicrobial resistance (21, 22).

76 Antimicrobial stewardship is an extremely effective means of preventing or resolving CDI  
77 outbreaks in healthcare settings (23-29). This approach contributed to the marked decline in  
78 fluoroquinolone resistant lineages in the UK a decade ago, with resistant ST1(027),  
79 ST3(001), ST42(106) and ST37(017) falling from 67% to ~3% of cases (30, 31).

80 Fluoroquinolone resistance can be predicted from whole genome sequences by characteristic  
81 single nucleotide polymorphisms (SNPs) in the chromosomal *gyrA* and/or *gyrB* genes (30,  
82 32). Equivalent analysis for cephalosporins is lacking, because the genetic mechanism(s)  
83 influencing cephalosporin susceptibility in *C. difficile* are unknown. Wild-type MICs are  
84 already moderate to high for this species (up to, and  $>256\mu\text{g/ml}$ ), (33-36), leading to the  
85 concept of ‘intrinsic’ rather than acquired cephalosporin resistance (10). For this reason, and

86 the practical difficulties of determining extremely high MICs near the limit of drug solubility,  
87 cephalosporin MICs are rarely measured for *C. difficile*.

88 Studies aiming to understand the mechanism of *C. difficile* cephalosporin resistance have  
89 focused on the endogenous *C. difficile* class D  $\beta$ -lactamase, but findings were inconclusive  
90 (37, 38). In many bacterial species, reduced susceptibility to cephalosporins and other  $\beta$ -  
91 lactams is conferred by amino acid substitutions in penicillin binding proteins (PBPs). These  
92 are enzymes catalysing cell wall peptidoglycan biosynthesis, which are classified according  
93 to molecular weight (high or low, H/LMW) and enzymatic activity (transpeptidase or  
94 carboxypeptidase) (39).  $\beta$ -lactam antibiotics target PBPs by acting as inhibitory substrate  
95 analogues (39), binding covalently to the active site serine (40) in the first of three conserved  
96 motifs; SXXK, (S/Y)XN and (K/H)(S/T)G (41).  $\beta$ -lactam exposure selects substitutions  
97 which reduce the affinity of the drug for the PBP, increasing the MIC (42, 43). However, the  
98 nature and frequency of PBP substitutions among clinically important *C. difficile* lineages,  
99 and their impact on cephalosporin MIC has not been investigated systematically. Here, our  
100 aim was to determine whether PBP substitutions have contributed to the emergence and  
101 spread of epidemic MDR *C. difficile*.

## 102 **RESULTS**

103 The study was designed as follows. A globally distributed collection of published *C. difficile*  
104 genomes was assembled (n=7094) representing sixteen genetic lineages; fourteen commonly  
105 associated with CDI in healthcare settings, and two carried asymptotically (non-toxigenic).  
106 The occurrence of recent, within-lineage PBP substitutions was investigated. Cephalosporin  
107 (and other  $\beta$ -lactam) MICs were measured for representative strains containing PBP  
108 substitutions, and closely related ‘wild-type’ ancestors. Finally, the timing and sequence of  
109 PBP substitution and fluoroquinolone resistance acquisition events was investigated  
110 phylogenetically.

### 111 **Lineages Studied**

112 The 7094 genomes represented lineages ST1(ribotypes 027/198/176/181) (n=1918),  
113 ST17(018) (n=279), ST42(106) (n=563), ST3(001) (n=411), ST37(017) (n=424) and its  
114 recent descendant ST81(369) (n=39), ST63(053) (n=37), ST54(012) (n=148), ST8(002)  
115 (n=593) and its recent descendant ST183 (n=14), ST11(078) (n=628), ST2(014/020) (n=790),  
116 ST6(005) (n=404), ST10(015) (n=263), ST7(026) (n=190), ST56(058) (n=16) and two  
117 prevalent non-toxigenic genotypes ST26(039) (n=175) and ST15(010) (n=202). Four  
118 genetically distinct *C. difficile* clades; 1, 2, 4 and 5 were represented (44). Genomes,  
119 accession numbers, AMR predictions from genotype and references are listed per lineage  
120 (Table S1).

### 121 ***C. difficile* PBPs**

122 To date, nine PBPs have been described within the *C. difficile* genome (Table 1) five of  
123 which are transpeptidases (PBP1-5) (45). HMW PBP1 and PBP3 are essential for growth *in*  
124 *vitro* (46), while LMW PBP2 and PBP4 are not essential for growth, but are required for  
125 sporulation (46). Only LMW PBP5 is variably present (45). PBP1-4 were present in all  
126 genomes studied, while PBP5 occurred in lineages ST3(001), ST11(078), and

127 ST37(017)/ST81(369). No additional PBPs were identified using known *C. difficile* PBP  
128 sequences in low stringency BLAST searches.

### 129 **Recent PBP Substitutions**

130 PBP gene sequences were compared within each lineage to identify recent single nucleotide  
131 polymorphisms (SNPs). These were absent or rare in LMW PBP2, PBP4 and PBP5. In  
132 contrast, multiple SNPs occurred in HMW PBP1 and PBP3, almost all of which were non-  
133 synonymous. The resultant amino acid substitutions affected a total of 48/993 (4.8%)  
134 positions in PBP3 and 50/856-926 (5.8-5.4%) positions in PBP1 (variable PBP1 size due to  
135 C-terminal repeats). Substitution data are shown per isolate (Table S1).

136 The frequency of each amino acid substitution was recorded per lineage (Table 2). This  
137 identified the most common substitutions within and among lineages. In PBP3, V497L was  
138 most frequent, occurring in 2897 genomes and 10 lineages, followed by A778V in 664  
139 genomes and 10 lineages. In PBP1, T674I/N/V was most frequent, occurring in 1379  
140 genomes of 10 lineages, followed by A555T in 442 genomes of 7 lineages. These data were  
141 then plotted to visualise the relative positions and frequencies of substitutions within PBP1  
142 and PBP3 (Figure 1). Virtually all substitutions occurred within the conserved transpeptidase  
143 domains, flanking the active site motifs.

### 144 **Co-occurrence of PBP substitutions with fluoroquinolone resistance**

145 In addition to PBP substitutions, the presence of fluoroquinolone resistance was investigated  
146 in all sixteen lineages (Figure 2, Table S1). Their co-occurrence was striking in lineages  
147 ST1(027/198/176/181), ST17(018), ST42(106), ST3(001), ST37(017)/ST81(369),  
148 ST63(053), ST54(012), ST8(002)/ST183 (Figure 2), suggesting the possibility of almost  
149 simultaneous acquisition. The presence of further AMR determinants, *ermB* (clindamycin

150 resistance) and, or *rpoB* substitutions (rifampicin resistance), was also recorded for each  
151 genome (Table S1).

152 Among the fourteen clinically important lineages, PBP substitutions occurred relatively  
153 rarely in the absence fluoroquinolone resistance (Figure 2). In this respect ST2(014/020)  
154 (178/790 genomes, 22.5%), ST54(012) (46/148 genomes, 31.1%) and recent ST42(106) USA  
155 genomes (44/180, 24.4%) were noteworthy. Interestingly, PBP substitutions occurred without  
156 fluoroquinolone resistance in the majority of genomes belonging to the non-toxicogenic  
157 lineages ST26(039) (167/175, 95.4%) and ST15(010) (182/202 (90.1%), (Figure 2, Table  
158 S1).

### 159 **Impact of PBP substitutions on $\beta$ -lactam MIC**

160  $\beta$ -lactam MICs were measured for isolates representing eight of the clinically important  
161 lineages studied. Four of these lineages contained both ‘wild-type’ and PBP-substituted  
162 strains; ST1(027), (both FQ-R1 and FQ-R2 (19)), ST17(018), ST3(001) and ST42(106). The  
163 remaining four lineages, included for comparison, were ‘wild-type’ only, lacking PBP  
164 substitutions; ST10(015), ST6(005), ST56(058) and ST7(026).

165 The choice of isolates from ST1(027), ST17(018), ST3(001) and ST42(106), was based on  
166 low numbers of SNP differences between wild type and PBP substituted genomes (Figure  
167 3A). In total, ten different PBP substitutions were represented, three in PBP3 and seven in  
168 PBP1 (Figure 3B), including the four most frequently identified substitutions.

169 Isolates containing PBP substitutions showed increased cephalosporin and carbapenem MICs  
170 relative to wild-type, but their penicillin MICs were unchanged (Figure 3A). The greatest  
171 increases in cephalosporin MICs were associated with the highest numbers of substitutions,  
172 for example cefuroxime MIC increased from 376 to 1506 $\mu$ g/ml in ST3(001) (four  
173 substitutions) and ST17(018) (five substitutions). Cephradine MIC increased from 36 to  
174 239 $\mu$ g/ml in the latter. Intriguingly, the wild-type ancestors of these four PBP substituted



175 lineages had cefotaxime MICs which were still higher than the four lineages which have not  
176 yielded PBP substituted strains; cefuroxime 128µg/ml vs 376µg/ml and cefotaxime 128µg/ml  
177 vs 256µg/ml.

### 178 **Phylogenetic analyses**

179 Recombination-corrected phylogenies were constructed to date and identify the sequence in  
180 which PBP substitution and fluoroquinolone resistance were acquired by seven genetic  
181 lineages. These included the four PBP substituted lineages which had been phenotyped  
182 (ST1(027), ST17(018), ST3(001) and ST42 (106)), and a further three lineages containing  
183 notable MDR PBP substituted fluoroquinolone resistant strains. These were ST8(002)/ST183  
184 and ST37(017)/ST81 - both important in South East Asia, and ST54(012) - notable in Costa  
185 Rica (47-51) (Figures 4-7).

186 Irrespective of lineage, the sequence of PBP substitution acquisitions in epidemic strains  
187 typically started with PBP3 V497L and/or A778V (ie. the most frequent PBP3 substitutions,  
188 Table 2). Then further PBP substitutions followed, yielding a variety of patterns. Among  
189 lineages well known for epidemic spread, the initial PBP3 V497L substitution occurred  
190 simultaneously with fluoroquinolone resistance (Figures 4-7). One notable exception was the  
191 ST1(027) FQ-R1 lineage in which PBP3 A726V substitution occurred first, while PBP3  
192 V497L was absent (Figure 4B).

193 PBP substituted, fluoroquinolone resistant clades evolved more than once in ST1(027),  
194 ST3(001), ST37(017)/ST81(369), ST42(106), and ST54(012) (Figures 4A,B, 5B, 6B, 7A,B).  
195 Their PBP substitution patterns each showed geographic structure (Figures 4-8). MDR clades  
196 with the highest numbers of PBP substitutions were identified within ST17(018) in Italy and  
197 South East Asia (Figure 5A), ST3(001) in UK/Germany (Figure 5B), ST8(002)/ST183 in  
198 Japan (Figure 6A), and ST37(017)/ST81(369) in South East Asia (Figure 6B).

199 The occurrence of PBP substitutions in the absence of fluoroquinolone resistance was  
200 investigated phylogenetically in ST2(014/020) (Figure 8), and to a lesser extent in ST42(106)  
201 and ST54(012) (Figure 7). For ST2(014/020), a dated phylogeny was constructed using PBP  
202 substituted genomes from six independent locations, together with wild type genomes from  
203 the same locations and dates (Figure 8). The PBP substituted genomes clustered by location,  
204 while the wild type strains did not. Interestingly, both ST42(106) and ST54(012) phylogenies  
205 (Figure 7) contained clades where PBP substitution acquisition preceded fluoroquinolone  
206 resistance. ST42(106) recently replaced ST1(027) as the most prevalent lineage in North  
207 America (Carlson et al., 2020), but a single MDR clade was not apparent; PBP3 V497L  
208 occurred on multiple independent occasions within the ST42(106) phylogeny.

### 209 **Evolutionary mechanisms of PBP substitution acquisition**

210 The almost total absence of non-synonymous SNPs within each lineage suggested that PBP  
211 substitutions accumulate by the step-wise fixation of *de novo* point mutations in response to  
212  $\beta$ -lactam selection, rather than the import of novel variants by horizontal genetic exchange.  
213 However, two important recombination events were identified by the co-import of  
214 synonymous and non-synonymous SNPs, which changed PBP variants within toxin A-B+  
215 ST81(369) (Figure S1) and in ST1(181), relative to their ancestral wild type A-B+ ST37(017)  
216 and ST1(027) wild type respectively. The ST81(369) PBP3 gene was acquired as part of a  
217 very long (~150kb) recombination event, the donor being closely related to ST8(002) (Figure  
218 S1). In ST1(181), described in Greece and Romania (52, 53) recombination events affected  
219 both PBP1 and PBP3, but their ~400kb separation around the chromosome suggests the  
220 events were independent; (i) the PBP3 allele (100) was identical to clade 1 ST17(018),  
221 indicating inter clade 1/2 recombination, and (ii) the PBP1 allele (360) contained 14 SNPs  
222 and 6 amino acid differences relative to wild type ST1.

223 **DISCUSSION**

224 To date, studies aiming to determine  $\beta$ -lactam resistance mechanisms in *C. difficile* have  
225 focused on the endogenous *C. difficile* class D  $\beta$ -lactamase (37, 38). PBP substitutions have  
226 been reported only occasionally, associated with raised carbapenem MICs in a single lineage  
227 (45, 54). PBPs with reduced  $\beta$ -lactam affinity are clinically important in other Gram-positive  
228 pathogens, for example *S. pneumoniae* (43), and methicillin resistant *Staphylococcus aureus*  
229 (55). The present study was therefore performed to investigate systematically, and  
230 phenotypically, recent PBP substitutions among clinically important lineages of *C. difficile*.

231 We identified multiple, recent PBP substitutions, which are focused in the conserved  
232 functional domains of the two HMW *C. difficile* transpeptidases, PBP1 and PBP3 (Table 2,  
233 Figure 1). Substitutions were associated with raised cephalosporin MICs, relative to closely  
234 related wild type strains, and the higher the number of substitutions, the higher the MIC  
235 (Figure 3A). The mechanism underlying substitution acquisition was not recombination, but  
236 rather the accumulation of *de novo* chromosomal mutations in response to selective pressure.  
237 This was indicated because virtually all SNPs were non-synonymous, flanked the catalytic  
238 domains (Figure 1), and arose multiple times (Table 2). Only two major recombination events  
239 were found involving ST81(369) (Figure S1), and ST1(181). Although PBP5 transpeptidase  
240 is variably present, it was not recently acquired by MDR *C. difficile* lineages. Its constant  
241 chromosomal location suggests that gradual loss, rather than recent acquisition may explain  
242 its variable presence.

243 The co-occurrence of PBP substitutions with fluoroquinolone resistance in the clinically  
244 important epidemic lineages was striking (Figure 2). This suggests that cephalosporin  
245 stewardship may be equal to fluoroquinolone stewardship (30) in its effectiveness for  
246 outbreak control. Furthermore, simultaneous stewardship of both drugs may have a greater  
247 impact on the control of MDR lineages, than either drug alone. Studies performed over 20

248 years ago, before widespread fluoroquinolone resistance emerged in *C. difficile*, reported  
249 cephalosporin stewardship alone to be successful (24, 56, 57). Approximately 20 years  
250 elapsed between the introduction of first generation cephalosporins (mid 1960s) and  
251 fluoroquinolones (late 1980s) (58). Selection of the wild-type precursors of the current  
252 epidemic lineages (Figure 3A), with cephalosporin MICs that exceed the wild type of other  
253 lineages, (WT cefuroxime 128 $\mu$ g/ml vs 376 $\mu$ g/ml and WT cefotaxime 128 $\mu$ g/ml vs  
254 256 $\mu$ g/ml) may have occurred during this time. However the mechanism underlying this  
255 difference in wild type MICs remains unknown. At present, the co-occurrence of resistance to  
256 both cephalosporins and fluoroquinolones hinders attempts to understand their relative  
257 importance in epidemic spread. Further controlled studies of cephalosporin and  
258 fluoroquinolone stewardship are needed.

259 Given the large number of PBP substituted, clinically important MDR clades which have  
260 emerged in the last 30 years, in different geographic regions (Figures 4-8), it is surprising that  
261 their elevated cephalosporin MICs have not been highlighted previously. This likely reflects  
262 the ‘intrinsic cephalosporin resistance’ concept (10), established in the early 1980s, when  
263 measured *C. difficile* cephalosporin MICs rarely exceeded 256 $\mu$ g/ml (33-36). These baseline  
264 MICs, which predate the emergence of the MDR clades, are already high relative to other  
265 pathogens, and were thought to exceed clinically relevant concentrations. The lack of a  
266 known mechanism of acquired  $\beta$ -lactam resistance compounded the situation.

267 Our phylogenies revealed the sequence and timing of MDR acquisition by clinically  
268 important lineages. The co-occurrence of PBP substitutions and fluoroquinolone resistance  
269 predated epidemic spread, which was reflected in short-branched, geographically structured  
270 clades (Figures 4-7). The first PBP substitution was typically PBP3 V497L, followed by  
271 others, yielding a variety of final combinations. The presence of *ermB*, (clindamycin  
272 resistance) and *rpoB* substitutions (rifampin resistance) was variable overall, but greater

273 numbers of PBP substitutions frequently occurred with these in addition to fluoroquinolone  
274 resistance (Table S1, ST17(018, ST37(017)/ST81(369), ST8(002)/ST81).

275 We dated the emergence of the two MDR ST1(027) clades (FQ-R1 and FQ-R2) to the  
276 mid/late-1990s, as previously described (19) (Figure 4A,B). The emergence date of the MDR  
277 ST17(018) clade was compatible with first reports of outbreaks in 1996-1999 (59), the  
278 phylogeny root having a 95% credible interval dating of December 1998-July 2002 (Figure  
279 5A). European and Asian ST17(018) clades then diverged, acquiring further region-specific  
280 PBP substitutions (Figure 5A), arguing against recent their recent intercontinental spread.

281 Greater numbers of PBP substitutions were associated with the highest cephalosporin MICs  
282 (Figure 3A). Consistent with this, highly substituted clades of multiple lineages (ST17(018),  
283 ST81(369)/ST37(018) and ST183/ST8(002, Figures 5A, 6A,B) predominated in South East  
284 Asia, where cephalosporin use is high (60-62). Adaptation to local prescribing conditions  
285 through PBP substitution acquisition offers a possible explanation for the temporal and  
286 geographic variation in prevalent *C. difficile* lineages (6, 8, 19, 47, 58, 63). This may extend  
287 to competitive exclusion of lesser PBP substituted strains by more highly substituted ones, a  
288 scenario requiring greater numbers of PBP substitutions to carry a fitness cost. This appears  
289 possible as in *C. perfringens in vitro*, PBP substitutions are associated with slower growth  
290 (64). We hypothesise that local levels of cephalosporin prescribing determine the prevalent *C.*  
291 *difficile* strain(s) in a given region. For example, the unusually low levels of ST1(027) seen in  
292 Asia, (65) may reflect competitive exclusion, under local prescribing conditions, by the more  
293 highly PBP substituted clades which predominate here. The relative geographic restriction of  
294 ST1(027)FQ-R1 (to USA, South Korea, Germany), compared to more globally distributed  
295 FQ-R2 may also reflect the different PBP substitutions of the two clades (Figure 4), and  
296 variations in MIC (Figure 3A).

297 MDR strains exhibit high transmissibility in clinical settings when prescribing is uncontrolled  
298 (17). The PBP1 and PBP3 transpeptidases function in cell wall biosynthesis, therefore  
299 substitutions impacting their catalytic domain could affect transmissibility via sporulation. A  
300 high sporulation phenotype has been reported in at least two epidemic lineages; ST3(001)  
301 (UK), and ST81(369) (Asia), (66, 67). Sporulation phenotype is reportedly variable in  
302 ST1(027), (68, 69), and we have observed variation in its PBP substitutions (Figure 4A,B,  
303 Table S1). However, the possibility of a link remains to be investigated. It is relevant to  
304 future experimental design that the MDR laboratory reference strains CD630 (ST54(012) and  
305 R20291 (ST1(027)) both contain PBP substitutions (Table 1).

306 PBP substitutions occurred *without* fluoroquinolone resistance in reasonable numbers of  
307 genomes of only three toxigenic lineages studied; ST2(020/014), ST54(012), and ST42(106)  
308 (USA) (Table S1). The latter was of interest since it recently exceeded the prevalence of  
309 ST1(027) in North America (8, 71). Visual inspection of phylogenies was used to assess  
310 whether PBP substitutions might enhance transmissibility in the absence of fluoroquinolone  
311 resistance. An ST2(020/014) phylogeny showed some possibility of locally enhanced  
312 transmission (Figure 8), as did ST54(012), and ST42(106) (USA) (Figure 7A,B). However,  
313 these events were small scale and this question remains to be answered. PBP substitutions  
314 (without fluoroquinolone resistance) were, however, widespread within the two non-  
315 toxigenic lineages ST15(010) and ST26(039), (Table S2) potentially explaining their high  
316 prevalence over other non-toxigenic strains.

317 The cephalosporin MICs for PBP substituted strains were extremely high for certain  
318 antibiotics (for example >512 $\mu$ g/ml for cefotaxime, and up to 1506 $\mu$ g/ml for cefuroxime,  
319 Figure 3A). This raises questions about the *in vivo* conditions required for PBP substitution  
320 selection. Intravenous  $\beta$ -lactams are eliminated in active form by biliary excretion, resulting  
321 in highly variable intestinal concentrations (71). Intestinal concentrations ranging from 1.01

322 to 1,345µg/ml have been reported (72) and so the potential exists for *C. difficile* to be  
323 exposed *in vivo* to cephalosporin concentrations reaching the MICs measured here. Resistant  
324 bacteria can also be selected experimentally at antimicrobial concentrations up to several  
325 hundred-fold below lethal levels (73-77). However, the overall contribution made by such  
326 ‘sub-MIC selection’ to resistance in clinically important bacteria is unknown (78).

327 To date, only ~1% of known *C. difficile* lineages (949 STs identified as at 13 May 2022,  
328 <https://pubmlst.org/organisms/clostridioides-difficile>) have evolved MDR clade(s).  
329 Furthermore, members of this minority have tended to evolve >1 such clade (Figure 4-7).  
330 This suggests a wild-type phenotype which favours the acquisition of chromosomal SNPs  
331 which raise cephalosporin and fluoroquinolone MICs. As discussed above, the baseline  
332 cephalosporin MICs for MDR-yielding lineages were higher than those lacking MDR strains  
333 (Figure 3A). This potentially favours survival of MDR-yielding lineages in low  
334 cephalosporin concentrations, allowing selection of PBP substitutions. An alternative,  
335 mechanism might be a hypermutator phenotype, as in *S. pneumoniae* (73).

336 In summary, our findings identify a role for cephalosporin selection in the evolution of  
337 epidemic CDI lineages. Specific regional prescribing practises may determine the locally  
338 predominant epidemic strains, potentially explaining the marked international variation in *C.*  
339 *difficile* molecular epidemiology. Since antimicrobial stewardship typically targets multiple  
340 drug classes (29, 79) and epidemic strains have raised MICs for fluoroquinolones,  
341 cephalosporins, (Figure 2) and more variably clindamycin (*ermB*) (Table S1), is difficult to  
342 determine the relative contributions made by stewardship of each drug to CDI control. The  
343 timing of cephalosporin and fluoroquinolone resistance acquisition, immediately before the  
344 emergence of multiple epidemic strains from divergent *C. difficile* genetic backgrounds,  
345 suggests AMR may be equally important as, or even exceed, strain-specific virulence  
346 determinants in driving epidemic CDI.

347 **MATERIALS AND METHODS**

348 WGS from 7094 *C. difficile* isolates, predominantly cultured from humans with CDI were  
349 obtained. Clinical isolates from hospital and community patients from Europe, North and  
350 South America, South East Asia, and Australia were included. Fourteen CDI lineages were  
351 represented, and two non-toxigenic lineages. A complete list of genomes, their identifiers in  
352 public databases, and references is provided (Table S1). Raw sequence reads were assembled  
353 *de novo* as required using Velvet (version 1.0.7 – 1.0.18) (80) and Velvet Optimiser with  
354 default settings (2.1.7) (81). A minority of genomes were obtained assembled, either from the  
355 NCBI database (82) or EnteroBase (83, 84). Assemblies were imported to a BIGSdb database  
356 (85) which was used to identify the seven loci used in multi-locus sequence typing (44).  
357 Sequence types (STs) were assigned using the *C. difficile* PubMLST database  
358 (<https://pubmlst.org/organisms/clostridioides-difficile/>). ST and PCR-ribotype were used to  
359 indicate genetic lineages, identified by the notation ST1(027) (sequence type-1 (PCR-  
360 ribotype-027)).  
361 BLAST searches performed within BIGSdb (85) were used to identify and extract  
362 chromosomal gene sequences for PBP transpeptidases (PBP1-5, (45)), together with *gyrA*,  
363 *gyrB*, and *rpoB*, specific mutations in which confer AMR. Established amino acid  
364 substitutions scored as conferring resistance to fluoroquinolones were GyrA T81I and GyrB  
365 D426N, and to rifampin RpoB R505K, H502N, S498T. Acquisition of *ermB*, conferring  
366 clindamycin resistance was also noted (86-89). Each unique allele sequence identified at  
367 these loci (PBP1-5, *gyrA*, *gyrB*, *rpoB* and *ermB*) was assigned a number (Table S1) and can  
368 be downloaded at <https://pubmlst.org/organisms/clostridioides-difficile/> (44, 85). Newly  
369 extracted gene sequences were queried against this database and the allele numbers were  
370 recorded for each genome, together with the substitutions relevant to AMR (Table S1).

371



372 **Identification of recent PBP substitutions**

373 This was achieved using MEGA (<https://www.megasoftware.net/>) (90), which facilitated  
374 within-lineage comparisons of the nucleotide and amino acid sequences of PBP1-5 alleles.  
375 Comparisons were made relative to the wild type PBP sequence for each lineage, wild-type  
376 alleles being taken from non-MDR genomes within the lineage.

377 **Phenotyping**

378 Isolates were chosen for phenotyping from four lineages, each of which contained both PBP  
379 substituted and wild type strains; ST1(027)FQ-R1 and FQ-R2, ST3(001), ST17(017) and  
380 ST42(106). Representatives for each lineage were chosen on the basis of minimal SNP  
381 distances (Figure 3A). Genomes of four lineages lacking MDR strains (wild type only), also  
382 underwent phenotyping; ST10(015), ST6(005), ST56(058) and ST7(026).

383 Minimum inhibitory concentrations of cefotaxime, cefuroxime, cephadrine, amoxicillin,  
384 amoxicillin-clavulante, meropenem, imipenem and piperacillin-tazobactam were determined  
385 by Wilkins Chalgren agar dilution methods (91, 92). Briefly, *C. difficile* isolates and controls  
386 (*C. difficile* ATCC700057, E4 (PCR ribotype 010) and *B. fragilis* 25285) were cultured in  
387 pre-reduced Schaedlers anaerobic broths at 37°C for 24h, anaerobically. Isolates and controls  
388 were diluted in pre-reduced saline to McFarland standard 1 equivalence and multipoint  
389 inoculated onto prepared antibiotic-containing agar plates and controls. Agar plates were  
390 incubated at 37°C for 24h, anaerobically prior to MIC determination. MIC was defined as the  
391 lowest concentration of antimicrobial that completely inhibited growth, showed only 1 or 2  
392 colonies, or left a faint haze of growth on the plate.

393 Antimicrobial concentrations were prepared using solvents and diluents recommended in the  
394 CLSI guidelines (93, 94). For amoxicillin clavulanate and piperacillin-tazobactam, clavulanic  
395 acid and tazobactam were added to agar at fixed concentrations of 2mg/L and 4 mg/L  
396 respectively. In order to test susceptibility within normal doubling dilutions, further antibiotic

397 concentrations were prepared for the antibiotic plate range. All antibiotics were tested at the  
398 following dilutions: 0.125, 0.25, 0.5, 1, 2, 4, 8, 16, 32, 36, 40, 46, 53, 64, 71, 80, 91, 107,  
399 128, 142, 160, 182, 213, 256, 284, 320, 366, 427, 512 mg/L. Additionally, cefuroxime and  
400 cephadrine were prepared up to their limit of solubility and the following ranges of dilutions  
401 were prepared. Cefuroxime: 102, 120, 143, 160, 205, 213, 240, 287, 319, 409, 478, 572  
402 mg/L. Cephadrine: 105, 118, 134, 157, 188, 209, 235, 269, 314, 376, 418, 471, 538, 627, 753,  
403 837, 941, 1076, 1255, 1506 mg/L.

#### 404 **Construction of dated phylogenies**

405 Dated phylogenies were constructed using genomes chosen to maximise geographic and  
406 temporal spread of wild type and AMR strains, as well as to represent the diversity of PBP  
407 substitutions detected in each lineage. Each set of genomes was first aligned to a reference  
408 using MuMMER version 3.1 (95) to produce a genome-wide alignment. Initial phylogenies  
409 were built using PhyML version 3.3 (96) which were then corrected for recombination using  
410 ClonalFrameML version 1.12 (97). Finally these phylogenies were dated using BactDating  
411 version 1.1 (98) assuming a mean evolutionary rate of 1.4 mutations per year per genome as  
412 in previous similar studies (99).

413 **ACKNOWLEDGEMENTS**

414 This study was supported by the National Institute for Health Research (NIHR) Oxford  
415 Biomedical Research Centre (BRC), and by the National Institute for Health Research  
416 (NIHR) Health Protection Research Unit in Healthcare Associated Infections and  
417 Antimicrobial Resistance (NIHR200915), a partnership between the UK Health Security  
418 Agency (UKHSA) and the University of Oxford.

419 XD was funded by the NIHR Health Protection Research Unit (HPRU) in Genomics and  
420 Enabling Data, and the NIHR HPRU in Gastrointestinal Infections.

421 MHW is supported by the National Institute for Health Research Leeds in Vitro Diagnostics  
422 Co-operative.

423 DWC is a NIHR Senior Investigator

424 ASW is a NIHR Senior Investigator.

425 DWE is a Robertson Foundation Fellow.

426

427 The funders had no role in study design, data collection and interpretation, or the decision to  
428 submit the work for publication. The views expressed are those of the authors and not  
429 necessarily those of the NHS, NIHR or Department of Health.

430

431 **DECLARATIONS**

432 DWE declares lecture fees from Gilead, outside the submitted work. No other author has a  
433 conflict of interest to declare.

434 **FIGURE LEGENDS**

435 **Figure 1. Positions and relative frequency of amino acid substitutions within PBP3 (993**  
436 **amino acids long) and PBP1 (856-926 amino acids).**

437 (A) Substitutions within PBP3 (n=48) are represented by purple circles, plotted according to  
438 locations within the PBP (x-axis). Circles are scaled according to substitution frequency  
439 within the entire dataset. Light grey shading indicates the position of conserved  
440 transpeptidase domains identified by BLASTP. Red circles indicate transpeptidase catalytic  
441 motifs.

442 (B) As (A), but PBP1 (n substitutions = 50), and dark grey indicates N-terminal glycosyl  
443 transferase domain.

444 (C) As (A), except relative sizes of blue circle indicates the number of lineages in which each  
445 substitution was identified.

446 (D) As (B), blue circles again indicating the number of lineages in which each substitution  
447 was identified.

448 Raw data, including the identity of each substitution are shown in Table 2.

449 **Figure 2. Occurrence of PBP substitutions and fluoroquinolone resistance in the 16**  
450 **lineages studied.**

451 **Figure 3.  $\beta$ -lactam MICs of wild type and PBP substituted *C. difficile* isolates.**

452 (A) MICs measured for the lineages, strains and  $\beta$ -lactams shown. PBP substitutions are  
453 highlighted by colour. Intensity of grey shading indicates fold increase in MIC from wild  
454 type. Numbers in superscript indicate the numbers of isolates tested, if >1. WT: wild-type,  
455 NT: not tested.

456 (B) Positions of the PBP substitutions (coloured as in (A)) contained in the isolates that  
457 underwent phenotyping (A), relative to the conserved transpeptidase domains (grey) and the  
458 active site motifs (red circles).

459 **Figure 4. Phylogenetic analysis of lineage ST1(027)**

460 (A) Dated phylogeny to show the emergence of lineage ST1(027) FQ-R1 (n=27) (19) (red  
461 branches) from wild type (n=27).

462 (B) Dated phylogeny to show the emergence of lineage ST1(027) FQ-R2 (n=67) (19) (red  
463 branches) from wild type (n=27).

464 Genomes were chosen to maximise temporal and geographic spread of wild type and AMR  
465 strains, and to represent the diversity of PBP substitutions detected. AMR determinants and  
466 PBP substitutions are as indicated in the key. Co-occurrence of fluoroquinolone resistance  
467 and PBP substitutions is highlighted by red branches. PBP substitutions are highlighted by  
468 coloured squares.

469 **Figure 5. Phylogenetic analysis of lineages ST17(018) and ST3(001)**

470 (A) Dated phylogeny to show the emergence of MDR lineage ST17(018) (n=66) (red  
471 branches) from wild type (n=53). MDR strains from Europe, South East Asia and North  
472 America were chosen to maximise geographic spread and PBP substitutions. These and other  
473 AMR determinants and PBP substitutions are as indicated in the key. Co-occurrence of  
474 fluoroquinolone resistance and PBP substitutions is highlighted by red branches.

475 (B) Dated phylogeny showing the evolutionary relationship of wild type (n=40) and PBP  
476 substituted ST3(001) genomes (n=77).

477 **Figure 6. Phylogenetic analysis of lineages ST37(017)/ST81(369) and ST8(002)/ST183**

478 (A) Dated phylogeny showing the evolutionary relationship of wild type (n=43) and PBP  
479 substituted ST8(002)/ST183 strains (n=47). Wild type genomes were chosen to maximise

480 genetic diversity (inferred using a previously constructed phylogeny (Dingle et al., 2017)).  
481 The MDR ST183 clade was identified here as emergent from MDR ST8(002). Co-occurrence  
482 of fluoroquinolone resistance and PBP substitutions is indicated by red branches in ST8(002)  
483 and light blue branches in ST183.  
484 (B) Dated phylogeny showing the evolutionary relationship of wild type (n=25) and PBP  
485 substituted ST37(017) (n=59) and ST81(369) (n=16) genomes. The MDR ST37(017)  
486 genomes were chosen to include representatives of strains associated with well documented  
487 outbreaks and other potential clusters identified by location and PBP substitution patterns.  
488 The MDR ST81(369) clade was identified here as emergent from MDR ST37(017). The  
489 majority of available wild type ST37(017) genomes represented healthcare-associated and  
490 asymptotically carried (infant) strains from a single location (Oxfordshire, UK (30; 104)).  
491 Co-occurrence of fluoroquinolone resistance and PBP substitutions is indicated by red  
492 branches in ST37(017) and light blue branches in ST81.

493 **Figure 7. Phylogenetic analysis of lineages ST42(106) and ST54(012)**

494 (A) Dated phylogeny for the ST42(106) lineage (n=111 genomes) showing the evolutionary  
495 relationship of wild type and fluoroquinolone and/or PBP substituted strains, chosen to  
496 represent overall diversity in terms of locations and PBP substitution patterns.  
497 (B) As above, but for the ST54(012) lineage (n=107 genomes).  
498 In both (A) and (B) the co-occurrence of fluoroquinolone resistance and PBP substitutions  
499 indicated by red branches, and PBP substitutions alone by blue branches.

500 **Figure 8. Phylogenetic analysis of ST2(014/020) genomes**

501 Dated phylogeny showing the evolutionary relationship between wild type (n=63) and PBP  
502 substituted ST2(014/020) strains (n=60) lacking fluoroquinolone resistance. Branch colour  
503 indicates one of six locations. Clustering of PBP substituted genomes is compared with wild  
504 type for six independent geographic locations. Wild type genomes from each location were

505 collected concurrently with the PBP substituted strains. Occurrence of AMR determinants is

506 indicated as shown in the key.

507

508 **REFERENCES**

- 509 1. Smits WK, Lyras D, Lacy DB, Wilcox MH, Kuijper EJ. 2016. *Clostridium difficile*  
510 infection. Nat Rev Dis Primers 2:16020.
- 511 2. McDonald LC, Killgore GE, Thompson A, Owens RC Jr, Kazakova SV, Sambol SP,  
512 Johnson S, Gerding DN. 2005. An epidemic, toxin gene-variant strain of *Clostridium*  
513 *difficile*. N Engl J Med 353:2433-2441.
- 514 3. Zaiss NH, Witte, W, Nübel U. 2010. Fluoroquinolone resistance and *Clostridium*  
515 *difficile*, Germany. Emerg Infect Dis 16:675-677.
- 516 4. Barbanti F, Spigaglia P. 2016. Characterization of *Clostridium difficile* PCR-ribotype  
517 018: A problematic emerging type. Anaerobe 42:123-129.
- 518 5. Imwattana K, Knight DR, Kullin B, Collins DA, Putsathit P, Kiratisin P, Riley TV.  
519 2020. Antimicrobial resistance in *Clostridium difficile* ribotype 017. Expert Rev Anti  
520 Infect Ther 18:17-25.
- 521 6. Freeman J, Vernon J, Pilling S, Morris K, Nicolson S, Shearman S, Clark E, Palacios-  
522 Fabrega JA, Wilcox M; Pan-European Longitudinal Surveillance of Antibiotic  
523 Resistance among Prevalent *Clostridium difficile* Ribotypes' Study Group. 2020.  
524 Five-year Pan-European, longitudinal surveillance of *Clostridium difficile* ribotype  
525 prevalence and antimicrobial resistance: the extended ClosER study. Eur J Clin  
526 Microbiol Infect Dis 39:169-177.
- 527 7. Lew T, Putsathit P, Sohn KM, Wu Y, Ouchi K, Ishii Y, Tateda K, Riley TV, Collins  
528 DA. 2020. Antimicrobial Susceptibilities of *Clostridium difficile* Isolates from 12  
529 Asia-Pacific Countries in 2014 and 2015. Antimicrob Agents Chemother 64:e00296-  
530 20.
- 531 8. Carlson TJ, Blasingame D, Gonzales-Luna AJ, Alnezary F, Garey KW. 2020.  
532 *Clostridioides difficile* ribotype 106: A systematic review of the antimicrobial



- 533           susceptibility, genetics, and clinical outcomes of this common worldwide strain.  
534           Anaerobe 62:102142.
- 535       9. Owens RC Jr, Donskey CJ, Gaynes RP, Loo VG, Muto CA. 2008. Antimicrobial-  
536           associated risk factors for *Clostridium difficile* infection. Clin Infect Dis 46 Suppl  
537           1:S19-31.
- 538       10. Gerding DN. 2004. Clindamycin, cephalosporins, fluoroquinolones, and *Clostridium*  
539           *difficile*-associated diarrhea: this is an antimicrobial resistance problem. Clin Infect  
540           Dis 38:646-648.
- 541       11. Muto CA, Pokrywka M, Shutt K, Mendelsohn AB, Nouri K, Posey K, Roberts T,  
542           Croyle K, Krystofiak S, Patel-Brown S, Pasculle AW, Paterson DL, Saul M, Harrison  
543           LH. 2005. A large outbreak of *Clostridium difficile*-associated disease with an  
544           unexpected proportion of deaths and colectomies at a teaching hospital following  
545           increased fluoroquinolone use. Infect Control Hosp Epidemiol 26:273-280.
- 546       12. Johnson S, Samore MH, Farrow KA. 1999. Epidemics of diarrhea caused by a  
547           clindamycin-resistant strain of *Clostridium difficile* in four hospitals. N Engl J Med  
548           341:1645-1651.
- 549       13. Loo VG, Poirier L, Miller MA, Oughton M, Libman MD, Michaud S, Bourgault AM,  
550           Nguyen T, Frenette C, Kelly M, Vibien A, Brassard P, Fenn S, Dewar K, Hudson TJ,  
551           Horn R, René P, Monczak Y, Dascal A. 2005. A predominantly clonal multi-  
552           institutional outbreak of *Clostridium difficile*-associated diarrhea with high morbidity  
553           and mortality. N Engl J Med 353:2442-2449.
- 554       14. Arvand M, Hauri AM, Zaiss NH, Witte W, Bettge-Weller G. 2009. *Clostridium*  
555           *difficile* ribotypes 001, 017, and 027 are associated with lethal *C. difficile* infection in  
556           Hesse, Germany. Euro Surveill 14:19403.

- 557 15. Goorhuis A, Debast SB, Dutilh JC, van Kinschot CM, Harmanus C, Cannegieter SC,  
558 Hagen EC, Kuijper EJ. 2011. Type-specific risk factors and outcome in an outbreak  
559 with two different *Clostridium difficile* types simultaneously in one Hospital. Clinical  
560 Infectious Diseases 53:860-869.
- 561 16. Walker AS, Eyre DW, Wyllie DH, Dingle KE, Griffiths D, Shine B, Oakley S,  
562 O'Connor L, Finney J, Vaughan A, Crook DW, Wilcox MH, Peto TE; Infections in  
563 Oxfordshire Research Database. 2013. Relationship between bacterial strain type, host  
564 biomarkers, and mortality in *Clostridium difficile* infection. Clin Infect Dis 56:1589-  
565 1600.
- 566 17. Baldan R, Trovato A, Bianchini V, Biancardi A, Cichero P, Mazzotti M, Nizzero P,  
567 Moro M, Ossi C, Scarpellini P, Cirillo DM. 2015. *Clostridium difficile* PCR Ribotype  
568 018, a Successful Epidemic Genotype J Clin Microbiol 53:2575-2580.
- 569 18. Serafino S, Consonni D, Migone De Amicis M, Sisto F, Domeniconi G, Formica S,  
570 Zarantonello M, Maraschini A, Cappellini MD, Spigaglia P, Barbanti F, Castaldi S,  
571 Fabio G. 2018. Clinical outcomes of *Clostridium difficile* infection according to strain  
572 type. A prospective study in medical wards. Eur J Intern Med 54:21-26.
- 573 19. He M, Miyajima F, Roberts P, Ellison L, Pickard DJ, Martin MJ, Connor TR, Harris  
574 SR, Fairley D, Bamford KB, D'Arc S, Brazier J, Brown D, Coia JE, Douce G,  
575 Gerding D, Kim HJ, Koh TH, Kato H, Senoh M, Louie T, Michell S, Butt E, Peacock  
576 SJ, Brown NM, Riley T, Songer G, Wilcox M, Pirmohamed M, Kuijper E, Hawkey P,  
577 Wren BW, Dougan G, Parkhill J, Lawley TD. 2013. Emergence and global spread of  
578 epidemic healthcare-associated *Clostridium difficile*. Nat Genet 45:109-113.
- 579 20. Senoh M, Haru Kato H. 2022. Molecular epidemiology of endemic *Clostridioides*  
580 *difficile* infection in Japan. Anaerobe 3:102510.

- 581 21. Hensgens MP, Goorhuis A, van Kinschot CM, Crobach MJ, Harmanus C, Kuijper EJ.  
582 2011. *Clostridium difficile* infection in an endemic setting in the Netherlands. Eur J  
583 Clin Microbiol Infect Dis 30:587-93.
- 584 22. Eyre DW, Davies KA, Davis G, Fawley WN, Dingle KE, De Maio N, Karas A, Crook  
585 DW, Peto TEA, Walker AS, Wilcox MH; EUCLID Study Group. 2018. Two distinct  
586 patterns of *Clostridium difficile* diversity across Europe indicating contrasting routes  
587 of spread. Clin Infect Dis 67:1035-1044.
- 588 23. Pear SM, Williamson TH, Bettin KM, Gerding DN, Galgiani JN. 1994. Decrease in  
589 nosocomial *Clostridium difficile*-associated diarrhea by restricting clindamycin use.  
590 Ann Intern Med 120:272-277.
- 591 24. McNulty C, Logan M, Donald IP, Ennis D, Taylor D, Baldwin RN, Bannerjee M,  
592 Cartwright KA. 1997. Successful control of *Clostridium difficile* infection in an  
593 elderly care unit through use of a restrictive antibiotic policy J Antimicrob Chemother  
594 40:707-711.
- 595 25. Valiquette L, Cossette B, Garant MP, Diab H, Pépin J. 2007. Impact of a reduction in  
596 the use of high-risk antibiotics on the course of an epidemic of *Clostridium difficile*-  
597 associated disease caused by the hypervirulent NAP1/027 strain. Clin Infect Dis  
598 45:S112-S121.
- 599 26. Debast SB, Vaessen N, Choudry A, Wieggers-Ligtvoet EAJ, van den Berg RJ, Kuijper  
600 EJ. 2009. Successful combat of an outbreak due to *Clostridium difficile* PCR ribotype  
601 027 and recognition of specific risk factors Clin Microbiol Infect 15:427-434.
- 602 27. Feazel LM, Malhotra A, Perencevich EN, Kaboli P, Diekema DJ, Schweizer ML.  
603 2014. Effect of antibiotic stewardship programmes on *Clostridium difficile* incidence:  
604 a systematic review and meta-analysis. J Antimicrob Chemother 69:1748-1754.

- 605 28. Sarma JB, Marshall B, Cleeve V, Tate D, Oswald T, Woolfrey S. 2015. Effects of  
606 fluoroquinolone restriction (from 2007 to 2012) on *Clostridium difficile* infections:  
607 interrupted time-series analysis. J Hosp Infect 91:74-80.
- 608 29. Muto CA, Blank MK, Marsh JW. 2007. Control of an outbreak of infection with the  
609 hypervirulent *Clostridium difficile* BI strain in a university hospital using a  
610 comprehensive “bundle” approach. Clin Infect Dis 45:1266-1273.
- 611 30. Dingle KE, Didelot X, Quan TP, Eyre DW, Stoesser N, Golubchik T, Harding RM,  
612 Wilson DJ, Griffiths D, Vaughan A, Finney JM, Wyllie DH, Oakley SJ, Fawley WN,  
613 Freeman J, Morris K, Martin J, Howard P, Gorbach S, Goldstein EJC, Citron DM,  
614 Hopkins S, Hope R, Johnson AP, Wilcox MH, Peto TEA, Walker AS, Crook DW;  
615 Modernising Medical Microbiology Informatics Group. 2017. Effects of control  
616 interventions on *Clostridium difficile* infection in England: an observational study.  
617 Lancet Infect Dis 17:411-421.
- 618 31. Lawes T, Lopez-Lozano JM, Nebot CA, Macartney G, Subbarao-Sharma R, Wares  
619 KD, Sinclair C, Gould IM. 2017. Effect of a national 4C antibiotic stewardship  
620 intervention on the clinical and molecular epidemiology of *Clostridium difficile*  
621 infections in a region of Scotland: a non-linear time-series analysis. Lancet Infect Dis  
622 17:194-206.
- 623 32. Huang H, Weintraub A, Fang H, Nord CE. 2009. Antimicrobial resistance in  
624 *Clostridium difficile*. Int J Antimicrob Agents 34:516-522.
- 625 33. Dzik J, Bartlett JG. 1980. *In vitro* susceptibility of *Clostridium difficile* isolates from  
626 patients with antibiotic-associated diarrhea or colitis. Antimicrob Agents Chemother  
627 17:695-698.
- 628 34. Shuttleworth R, Taylor M, Jones DM. 1980. Antimicrobial susceptibilities of  
629 *Clostridium difficile*. J Clin Pathol 33:1002-1005.

- 630 35. Greenfield RA, Kurzynski TA, Craig, WA. 1982. *In vitro* susceptibility of  
631 *Clostridium difficile* isolates to cefotaxime, moxalactam, and cefoperazone.  
632 *Antimicrob Agents and Chemother* 21:846-847.
- 633 36. Chow AW, Cheng N, Bartlett KH. 1985. *In vitro* susceptibility of *Clostridium difficile*  
634 to new beta-lactam and quinolone antibiotics. *Antimicrob Agents Chemother* 28:842-  
635 844.
- 636 37. Toth M, Stewart NK, Smith C, Vakulenko SB. 2018. Intrinsic Class D  $\beta$ -Lactamases  
637 of *Clostridium difficile*. *mBio* 9:e01803-18.
- 638 38. Sandhu BK, Edwards AN, Anderson SE, Woods EC, McBride SM. 2019. Regulation  
639 and Anaerobic Function of the *Clostridioides difficile*  $\beta$ -Lactamase. *Antimicrob*  
640 *Agents Chemother* 64:e01496-19.
- 641 39. Fisher JF, Mobashery S. 2016.  $\beta$ -Lactam Resistance Mechanisms: Gram-Positive  
642 Bacteria and *Mycobacterium tuberculosis*. *Cold Spring Harb Perspect Med*  
643 6:a025221.
- 644 40. Sauvage E, Kerff F, Terrak M, Ayala JA, Charlier P. 2008. The penicillin-binding  
645 proteins: structure and role in peptidoglycan biosynthesis. *FEMS Microbiology*  
646 *Reviews* 32:234-258.
- 647 41. Zapun A, Contreras-Martel C, Vernet T. 2008. Penicillin-binding proteins and  $\beta$ -  
648 lactam resistance. *FEMS Microbiol Rev* 32:361-385.
- 649 42. Kwon DH, Dore MP, Kim JJ, Kato M, Lee M, Wu JY, Graham DY. 2003. High-level  
650 beta-lactam resistance associated with acquired multidrug resistance in *Helicobacter*  
651 *pylori*. *Antimicrob Agents Chemother* 47:2169-2178.
- 652 43. Dewé TCM, D'Aeth JC, Croucher NJ. 2019. Genomic epidemiology of penicillin-  
653 non-susceptible *Streptococcus pneumoniae*. *Microb Genom* 5:e000305.

- 654 44. Griffiths D, Fawley W, Kachrimanidou M, Bowden R, Crook DW, Fung R,  
655 Golubchik T, Harding RM, Jeffery KJ, Jolley KA, Kirton R, Peto TE, Rees G,  
656 Stoesser N, Vaughan A, Walker AS, Young BC, Wilcox M, Dingle KE. 2010.  
657 Multilocus sequence typing of *Clostridium difficile*. J Clin Microbiol 483:770-778.
- 658 45. Isidro J, Santos A, Nunes A, Borges V, Silva C, Vieira L, Mendes AL, Serrano M,  
659 Henriques AO, Gomes JP, Oleastro M. 2018. Imipenem Resistance in *Clostridium*  
660 *difficile* Ribotype 017, Portugal. Emerg Infect Dis 24:741-745.
- 661 46. Dembek M, Barquist L, Boinett CJ, Cain AK, Mayho M, Lawley TD, Fairweather  
662 NF, Fagan RP. 2015. High-throughput analysis of gene essentiality and sporulation in  
663 *Clostridium difficile*. mBio 6:e02383.
- 664 47. Aoki K, Takeda S, Miki T, Ishii Y, Tateda K. 2019. Antimicrobial susceptibility and  
665 molecular characterisation using whole-genome sequencing of *Clostridioides difficile*  
666 collected in 82 hospitals in Japan between 2014 and 2016. Antimicrob Agents  
667 Chemother. 63:e01259-19.
- 668 48. Jia H, Du P, Yang H, Zhang Y, Wang J, Zhang W, Han G, Han N, Yao Z, Wang H,  
669 Zhang J, Wang Z, Ding Q, Qiang Y, Barbut F, Gao GF, Cao Y, Cheng Y, Chen C.  
670 2016. Nosocomial transmission of *Clostridium difficile* ribotype 027 in a Chinese  
671 hospital, 2012-2014, traced by whole genome sequencing. BMC Genomics 17:405.
- 672 49. Qin J, Dai Y, Ma X, Wang Y, Gao Q, Lu H, Li T, Meng H, Liu Q, Li M. 2017.  
673 Nosocomial transmission of *Clostridium difficile* Genotype ST81 in a general  
674 teaching hospital in China traced by whole genome sequencing. Sci Rep 7:9627.
- 675 50. Wu Y, Liu C, Li WG, Xu JL, Zhang WZ, Dai YF, Lu JX. 2019. Independent  
676 Microevolution Mediated by Mobile Genetic Elements of Individual *Clostridium*  
677 *difficile* Isolates from Clade 4 Revealed by Whole-Genome Sequencing. mSystems  
678 4:e00252-18.

- 679 51. Ramírez-Vargas G, Quesada-Gómez C, Acuña-Amador L, López-Ureña D, Murillo T,  
680 Del Mar Gamboa-Coronado M, Chaves-Olarte E, Thomson N, Rodríguez-Cavallini E,  
681 Rodríguez C. 2017. A *Clostridium difficile* lineage endemic to Costa Rican hospitals  
682 is multidrug resistant by acquisition of chromosomal mutations and novel mobile  
683 genetic elements. *Antimicrob Agents Chemother* 61:e02054-16.
- 684 52. Kachrimanidou M, Baktash A, Metallidis S, Tsachouridou O, Netsika F, Dimoglou D,  
685 Kassomenaki A, Mouza E, Haritonidou M, Kuijper E. 2020. An outbreak of  
686 *Clostridioides difficile* infections due to a 027-like PCR ribotype 181 in a  
687 rehabilitation centre: Epidemiological and microbiological characteristics. *Anaerobe*  
688 65:102252.
- 689 53. Boekhoud IM, Sidorov I, Nooij S, Harmanus C, Bos-Sanders IMJG, Viprey V, Spittal  
690 W, Clark E, Davies K, Freeman J, Kuijper EJ, Smits WK; COMBACTE-CDI  
691 Consortium. 2021. Haem is crucial for medium-dependent metronidazole resistance in  
692 clinical isolates of *Clostridioides difficile*. *J Antimicrob Chemother* 76:1731-1740.
- 693 54. Imwattana K, Putsathit P, Knight DR, Kiratisin P, Riley TV. 2021. Molecular  
694 Characterization of, and Antimicrobial Resistance in, *Clostridioides difficile* from  
695 Thailand, 2017-2018. *Microb Drug Resist* 27:1505-1512.
- 696 55. Hiramatsu K, Cui L, Kuroda M, Ito T. 2001. The emergence and evolution of  
697 methicillin-resistant *Staphylococcus aureus*. *Trends Microbiol* 9:486-493.
- 698 56. Ludlam H, Brown N, Sule O, Redpath C, Coni N, Owen G. 1999. An antibiotic policy  
699 associated with reduced risk of *Clostridium difficile*-associated diarrhoea. *Age Ageing*  
700 28:578-580.
- 701 57. O'Connor KA, Kingston M, O'Donovan M, Cryan B, Twomey C, O'Mahony D. 2004.  
702 Antibiotic prescribing policy and *Clostridium difficile* diarrhoea *QJM*. 97:423-429.

- 703 58. Belmares J, Johnson S, Parada JP. 2009. Molecular epidemiology of *Clostridium*  
704 *difficile* over the course of 10 years in a tertiary care hospital. Clin Infect Dis 49:1141-  
705 1147.
- 706 59. Kato H, Kita H, Karasawa T, Maegawa T, Koino Y, Takakuwa H, Saikai T,  
707 Kobayashi K, Yamagishi T, Nakamura S. 2001. Colonisation and transmission of  
708 *Clostridium difficile* in healthy individuals examined by PCR ribotyping and pulsed-  
709 field gel electrophoresis. J Med Microbiol 50:720-727.
- 710 60. Muraki Y, Yagi T, Tsuji Y, Nishimura N, Tanabe M, Niwa T, Watanabe T, Fujimoto  
711 S, Takayama K, Murakami N, Okuda M. 2016. Japanese antimicrobial consumption  
712 surveillance: First report on oral and parenteral antimicrobial consumption in Japan  
713 (2009-2013). J Glob Antimicrob Resist 7:19-23.
- 714 61. Kim YA, Park YS, Youk T, Lee H, Lee K. 2018. Changes in Antimicrobial Usage  
715 Patterns in Korea: 12-Year Analysis Based on Database of the National Health  
716 Insurance Service-National Sample Cohort. Sci Rep 8:12210.
- 717 62. Qu X, Yin C, Sun X, Huang S, Li C, Dong P, Lu X, Zhang Z, Yin A. 2018.  
718 Consumption of antibiotics in Chinese public general tertiary hospitals (2011-2014):  
719 Trends, pattern changes and regional differences. PLoS One 13:e0196668.
- 720 63. Collins DA, Hawkey PM, Riley TV. 2013. Epidemiology of *Clostridium difficile*  
721 infection in Asia. Antimicrob Resist Infect Control 2:21.
- 722 64. Park M, Rafii F. 2017. Exposure to beta-lactams results in the alteration of penicillin-  
723 binding proteins in *Clostridium perfringens*. Anaerobe 45:78-85.
- 724 65. Cheng JW, Xiao M, Kudinha T, Xu Z, Hou X, Sun L, Zhang L, Fan X, Kong F, Xu  
725 Y. 2016. The first two *Clostridium difficile* Ribotype 027/ST1 Isolates identified in  
726 Beijing, China-an emerging problem or a neglected threat? Sci Rep 6:18834.



- 727 66. Wilcox MH, Fawley WN. 2000. Hospital disinfectants and spore formation by  
728 *Clostridium difficile*. Lancet 356:1324.
- 729 67. Wang B, Peng W, Zhang P, Su J. 2018. The characteristics of *Clostridium difficile*  
730 ST81, a new PCR ribotype of toxin A- B+ strain with high-level fluoroquinolones  
731 resistance and higher sporulation ability than ST37/PCR ribotype 017. FEMS  
732 Microbiol Lett 365(17).
- 733 68. Burns DA, Heap JT, Minton NP. 2010. The diverse sporulation characteristics of  
734 *Clostridium difficile* clinical isolates are not associated with type. Anaerobe 16:618-  
735 622.
- 736 69. Burns DA, Heeg D, Cartman ST, Minton NP. 2011. Reconsidering the sporulation  
737 characteristics of hypervirulent *Clostridium difficile* BI/NAP1/027. PLoS One  
738 6:e24894.
- 739 70. Karlowsky JA, Adam HJ, Baxter MR, Dutka CW, Nichol KA, Laing NM, Golding  
740 GR, Zhanel GG. 2020. Antimicrobial susceptibility of *Clostridioides difficile* isolated  
741 from diarrhoeal stool specimens of Canadian patients: summary of results from the  
742 Canadian *Clostridioides difficile* (CAN-DIFF) surveillance study from 2013 to 2017.  
743 J Antimicrob Chemother 75:1824-1832.
- 744 71. Karachalios G, Charalabopoulos K. 2002. Biliary excretion of antimicrobial drugs.  
745 Chemotherapy 48:280-297.
- 746 72. Kokai-Kun JF, Roberts T, Coughlin O, Sicard E, Rufiange M, Fedorak R, Carter C,  
747 Adams MH, Longstreth J, Whalen H, Sliman J. 2017. The oral beta-lactamase SYN-  
748 004 (ribaxamase) degrades ceftriaxone excreted into the intestine in phase 2a clinical  
749 studies. Antimicrob Agents Chemother 61:e02197-16.

- 750 73. Negri MC, Morosini MI, Baquero MR, del Campo R, Blázquez J, Baquero F. 2002.  
751 Very low cefotaxime concentrations select for hypermutable *Streptococcus*  
752 *pneumoniae* populations. *Antimicrob Agents Chemother* 46:528-530.
- 753 74. Gullberg E, Cao S, Berg OG, Ilbäck C, Sandegren L, Hughes D, Andersson DI. 2011.  
754 Selection of resistant bacteria at very low antibiotic concentrations. *PLoS Pathog*  
755 7:e1002158.
- 756 75. Gullberg E, Albrecht LM, Karlsson C, Sandegren L, Andersson DI. 2014. Selection of  
757 a multidrug resistance plasmid by sublethal levels of antibiotics and heavy metals.  
758 *mBio* 5: e01918-01914.
- 759 76. Andersson DI, Hughes D. 2012. Evolution of antibiotic resistance at non-lethal drug  
760 concentrations. *Drug Resist Updat* 15:162-172.
- 761 77. Murray AK, Zhang L, Yin X, Zhang T, Buckling A, Snape J, Gaze WH. 2018. Novel  
762 insights into selection for antibiotic resistance in complex microbial communities.  
763 *mBio* 9:e00969-18.
- 764 78. Sandegren L. 2014. Selection of antibiotic resistance at very low antibiotic  
765 concentrations. *Ups J Med Sci* 119:103-107.
- 766 79. [http://www.hpa.org.uk/webc/HPAwebFile/HPAweb\\_C/1232006607827](http://www.hpa.org.uk/webc/HPAwebFile/HPAweb_C/1232006607827)
- 767 80. Zerbino DR, Birney E. 2008. Velvet: algorithms for de-novo short read assembly  
768 using de Bruijn graphs. *Genome Res* 18:821-829.
- 769 81. Gladman S, Seemann T. 2008. VelvetOptimiser, 2.1.7. Monash University, Victoria,  
770 Australia.
- 771 82. NCBI database. <https://www.ncbi.nlm.nih.gov/genome/browse#!/prokaryotes/535/>
- 772 83. Enterobase <https://enterobase.warwick.ac.uk/species/index/clostridium>
- 773 84. Frentrop M, Zhou Z, Steglich M, Meier-Kolthoff JP, Göker M, Riedel T, Bunk B,  
774 Spröer C, Overmann J, Blaschitz M, Indra A, von Müller L, Kohl TA, Niemann S,

- 775 Seyboldt C, Klawonn F, Kumar N, Lawley TD, García-Fernández S, Cantón R, Del  
776 Campo R, Zimmermann O, Groß U, Achtman M, Nübel U. 2020. A publicly  
777 accessible database for *Clostridioides difficile* genome sequences supports tracing of  
778 transmission chains and epidemics. *Microb Genom* 6:mgen000410.
- 779 85. Jolley KA, Bray JE, Maiden MCJ. 2018. Open-access bacterial population genomics:  
780 BIGSdb software, the PubMLST.org website and their applications. *Wellcome Open*  
781 *Res* 3:124.
- 782 86. Spigaglia P, Barbanti F, Mastrantonio P. 2008. Fluoroquinolone resistance in  
783 *Clostridium difficile* isolates from a prospective study of *C. difficile* infections in  
784 Europe. *J Med Microbiol* 57:784-789.
- 785 87. Drudy D, Quinn T, O'Mahony R, Kyne L, O'Gaora P, Fanning S. 2006. High-level  
786 resistance to moxifloxacin and gatifloxacin associated with a novel mutation in *gyrB*  
787 in toxin-A-negative, toxin-B-positive *Clostridium difficile*. *J Antimicrob Chemother*  
788 58:1264-1267.
- 789 88. Curry SR, Marsh JW, Shutt KA, Muto CA, O'Leary MM, Saul MI, Pasculle AW,  
790 Harrison LH. 2009. High frequency of rifampin resistance identified in an epidemic  
791 *Clostridium difficile* clone from a large teaching hospital. *Clin Infect Dis* 48:425-429.
- 792 89. Spigaglia P, Barbanti F, Mastrantonio P; European Study Group on *Clostridium*  
793 *difficile* (ESGCD). 2011. Multidrug resistance in European *Clostridium difficile*  
794 clinical isolates. *J Antimicrob Chemother* 66:2227-2234.
- 795 90. Tamura K, Stecher G, Kumar S. 2021. MEGA11: Molecular Evolutionary Genetics  
796 Analysis Version 11. *Molecular Biology and Evolution* 38:3022-3027.
- 797 91. Baines SD, O'Connor R, Freeman J, Fawley WN, Harmanus C, Mastrantonio,  
798 Kuijper EJ, Wilcox MJ. 2008. Emergence of reduced susceptibility to metronidazole  
799 in *Clostridium difficile*. *J Antimicrob Chemother* 62:1046-1052.

- 800 92. Freeman, J , Vernon, J, Morris K, Nicholson S, Todhunter S, Longshaw C, Wilcox  
801 MH. 2015. Pan-European longitudinal surveillance of antibiotic resistance among  
802 prevalent *Clostridium difficile* ribotypes. Clin Microbiol Infect 21:e9-16.
- 803 93. Clinical Laboratory Standards Institute. M11-A8. Methods for Antimicrobial  
804 Susceptibility Testing of Anaerobic Bacteria; Approved Standard - 8th Edition. 2012.
- 805 94. Clinical Laboratory Standards Institute, M100S. Performance Standards for  
806 Antimicrobial Susceptibility Testing. 2012.
- 807 95. Kurtz S, Phillippy A, Delcher AL, Smoot M, Shumway M, Antonescu C, Salzberg  
808 SL. 2004. Versatile and open software for comparing large genomes. Genome Biol.  
809 5:R12.
- 810 96. Guindon S, Dufayard J-F, Lefort V, Anisimova M, Hordijk W, Gascuel O. 2010. New  
811 algorithms and methods to estimate maximum-likelihood phylogenies: assessing the  
812 performance of PhyML 3.0. Syst Biol 59:307-321.
- 813 97. Didelot X, Wilson DJ. 2015. ClonalFrameML: Efficient Inference of Recombination  
814 in Whole Bacterial Genomes. PLoS Comput Biol 11:e1004041.
- 815 98. Didelot X, Croucher NJ, Bentley SD, Harris SR, Wilson DJ. 2018. Bayesian inference  
816 of ancestral dates on bacterial phylogenetic trees. Nucleic Acids Res. 46:e134.
- 817 99. Didelot X, Eyre DW, Cule M, Ip CLC, Ansari MA, Griffiths D, Vaughan A,  
818 O'Connor L, Golubchik T, Batty EM, Piazza P, Wilson DJ, Bowden R, Donnelly PJ,  
819 Dingle KE, Wilcox M, Walker AS, Crook DW, Peto TE, Harding RM. 2012.  
820 Microevolutionary analysis of *Clostridium difficile* genomes to investigate  
821 transmission. Genome Biology 13:R118.
- 822 100. Lawley TD, Croucher NJ, Yu L, Clare S, Sebahia M, Goulding D, Pickard  
823 DJ, Parkhill J, Choudhary J, Dougan G. 2009. Proteomic and genomic

- 824 characterization of highly infectious *Clostridium difficile* 630 spores. J Bacteriol  
825 191:5377-5386.
- 826 101. Pettit LJ, Browne HP, Yu L, Smits WK, Fagan RP, Barquist L, Martin MJ,  
827 Goulding D, Duncan SH, Flint HJ, Dougan G, Choudhary JS, Lawley TD. 2014.  
828 Functional genomics reveals that *Clostridium difficile* Spo0A coordinates sporulation,  
829 virulence and metabolism. BMC Genomics 15:160.
- 830 102. He M, Sebahia M, Lawley TD, Stabler RA, Dawson LF, Martin MJ, Holt KE,  
831 Seth-Smith HM, Quail MA, Rance R, Brooks K, Churcher C, Harris D, Bentley SD,  
832 Burrows C, Clark L, Corton C, Murray V, Rose G, Thurston S, van Tonder A, Walker  
833 D, Wren BW, Dougan G, Parkhill J. 2010. Evolutionary dynamics of *Clostridium*  
834 *difficile* over short and long time scales. Proc Natl Acad Sci USA 107:7527-7532.
- 835 103. Sebahia M, Wren BW, Mullany P, Fairweather NF, Minton N, Stabler R,  
836 Thomson NR, Roberts AP, Cerdeño-Tárraga AM, Wang H, Holden MT, Wright A,  
837 Churcher C, Quail MA, Baker S, Bason N, Brooks K, Chillingworth T, Cronin A,  
838 Davis P, Dowd L, Fraser A, Feltwell T, Hance Z, Holroyd S, Jagels K, Moule S,  
839 Mungall K, Price C, Rabbinowitsch E, Sharp S, Simmonds M, Stevens K, Unwin L,  
840 Whithead S, Dupuy B, Dougan G, Barrell B, Parkhill J. 2006. The multidrug-resistant  
841 human pathogen *Clostridium difficile* has a highly mobile, mosaic genome. Nat Genet  
842 38:779-786.
- 843 104. Stoesser N, Eyre DW, Quan TP, Godwin H, Pill G, Mbuvi E, Vaughan A,  
844 Griffiths D, Martin J, Fawley W, Dingle KE, Oakley S, Wanelik K, Finney JM,  
845 Kachrimanidou M, Moore CE, Gorbach S, Riley TV, Crook DW, Peto TEA, Wilcox  
846 MH, Walker AS; Modernising Medical Microbiology Informatics Group (MMMIG).  
847 2017. Epidemiology of *Clostridium difficile* in infants in Oxfordshire, UK: Risk

848 factors for colonization and carriage, and genetic overlap with regional *C. difficile*

849 infection strains. PLoS One. 12(8):e0182307.

850

851 **TABLE 1. PBPs and  $\beta$ -Lactamases of *C. difficile* Reference Genomes**

| R20291 loci<br>NC 013316.1 | CD630 loci (former)<br>NC 009089.1 | Alternate designation                    | PBP Classification            | Size (aa) | Blastp predicted function/family                                                                          | Blastp e value <sup>g</sup> |
|----------------------------|------------------------------------|------------------------------------------|-------------------------------|-----------|-----------------------------------------------------------------------------------------------------------|-----------------------------|
| 0712 <sup>a</sup>          | RS04495 (07810) <sup>d</sup>       | <b>PBP1</b> <sup>f</sup>                 | HMW class A                   | 897       | Bifunctional transglycosylase/transpeptidase<br>pbp_1A_fam                                                | 2.14e-166                   |
| 0985 <sup>a</sup>          | RS06420 (11480) <sup>d</sup>       | <b>PBP3</b> <sup>f</sup>                 | HMW class B                   | 992       | Transpeptidase Pbp2_mrdA for cell elongation                                                              | 1.53e-127                   |
| 1067 <sup>b</sup>          | RS06830 (12290)                    | <b>PBP2</b> <sup>f</sup>                 | LMW class B                   | 554       | FtsI/Pbp2                                                                                                 | 2.85e-101                   |
|                            |                                    |                                          |                               |           | Transpeptidase Pbp2_mrdA for cell elongation                                                              | 1.81e-93                    |
| 2544 <sup>b</sup>          | RS14215 (26560) <sup>d</sup>       | <b>PBP4</b> <sup>f</sup><br><i>spoVD</i> | LMW class B                   | 659       | <i>spoVD</i> _pbp transpeptidase                                                                          | 0e+00                       |
|                            |                                    |                                          |                               |           | FtsI/Pbp2                                                                                                 | 3.23e-165                   |
| -                          | -                                  | <b>PBP5</b> <sup>e,f</sup><br>strain M68 | LMW class B                   | 696       | FtsI/Pbp2                                                                                                 | 1.00e-110                   |
|                            |                                    |                                          |                               |           | Pbp2_mrdA transpeptidase                                                                                  | 2.67e-104                   |
| 1131 <sup>b</sup>          | RS07160 (12910) <sup>d</sup>       | <i>dacF</i>                              | LMW class C                   | 387       | D-alanyl-D-alanine carboxypeptidase                                                                       | 1.68e-116                   |
| 2048 <sup>b</sup>          | RS11615 (21410)                    |                                          | LMW class C                   | 397       | D-alanyl-D-alanine carboxypeptidase                                                                       | 2.31e-88                    |
| 0441 <sup>c</sup>          | RS03150 (05150)                    |                                          | LMW class C                   | 414       | D-alanyl-D-alanine carboxypeptidase                                                                       | 8.55e-94                    |
| 2390 <sup>c</sup>          | RS13415 (24980)                    | <i>dacF1</i>                             | LMW class C                   | 429       | D-alanyl-D-alanine carboxypeptidase                                                                       | 7.59e-97                    |
| 3056 <sup>b</sup>          | RS17015 (31960)                    |                                          | PBP or<br>$\beta$ -lactamase? | 340       | Blastp: CubicO group peptidase, $\beta$ -lactamase class C (R20291 'put. PBP'; CD630 'serine hydrolase')  | 3.06e-40                    |
| 1318 <sup>c</sup>          | RS08060 (14690)                    | <i>cwp20</i>                             | PBP or<br>$\beta$ -lactamase? | 1013      | Blastp: $\beta$ -lactamase, cell wall binding protein repeats (R20291 'put. PBP', 'cell surface protein') | 2.40e-55                    |
| 2283                       | RS12870 (23930)                    |                                          |                               | 338       | Transglycosylase domain containing protein                                                                | 1.37e-74                    |
| 0399                       | RS02840 (04580)                    | <i>blaCDD</i> ,<br>CDD1/2                | $\beta$ -lactamase            | 312       | YbaI Class D Beta-lactamase (37)                                                                          | 5.94e-51                    |

852

853 Grey shading: proteins containing transpeptidase domains

854 <sup>a</sup>Essential for growth *in vitro* only PBP1 and PBP3 (46).

855 <sup>b</sup>Not essential for growth *in vitro*, but required for sporulation (46).

856 <sup>c</sup>Not essential for growth *in vitro* (46).

857 <sup>d</sup>Existence shown experimentally by mass spec (100, 101).

858 <sup>e</sup>PBP5 absent in R20291 and CD630; present in M68 (NC\_017175.1) chromosomal locus RS02615, co-ordinates 501965-504052.

859 <sup>f</sup>PBP1 - 5 (45).

860 <sup>§</sup>Blastp e-values for R20291 sequences; closer to zero, the more significant the match.

861

862 **MDR Reference strains contain the following PBP Substitutions relative to wild type of the identical genotype:**

863 R20291, ST1(027) UK 2006 (102) contains PBP3 V497L

864 CD630, ST54(012), Switzerland 1982 (103) contains PBP1 T674I and PBP3 N537K.

865 M68, ST37(017), Ireland 2006 (102) contains PBP3 Y721C.





875 **SUPPLEMENTAL MATERIAL**

876 **Figure S1.** ST81(369) PBP3 was acquired via a long recombination event.

877 Distance plots showing pairwise comparisons of the donor ST8(002), recipient ST37(017)  
878 and recombinant ST81(369), with the aim of identifying the size and location of the  
879 recombination event. The genomes used were ST8(002) isolate W0003a NZ\_CP025047.1  
880 (Yin et al., 2018), ST37(017) isolate M68 NC\_017175.1 (He et al., 2010), and ST81(369)  
881 isolate 28 WGS:QNW101, (Bioproject PRJNA479396, Assembly GCA\_003326885.1) (Wu  
882 et al., 2019).

883 The plots extend from 0.9 to 1.4 Mbp relative to M68 (x axis) so the locations of both PBP1  
884 and PBP3 are covered; PBP1 at 907,056-904,363 (gene CDM68\_RS04280) and PBP3 at  
885 1,219,021-1,221,999, (gene CDM68\_RS05670), indicated by vertical red dashed lines.

886 Missing lines indicate alignment gaps.

887 The large recombination event involves ~150kbp (~3.5% of the 4,308,325bp genome). A  
888 much smaller region occurred near the middle of the large event (position ~1.22Mbp) where  
889 ST81(369) no longer resembles ST8(002), but resembles ST37(017) instead. It appears likely  
890 that this short region, adjacent to PBP3, has recombined back with ST37(017).

Figure 1

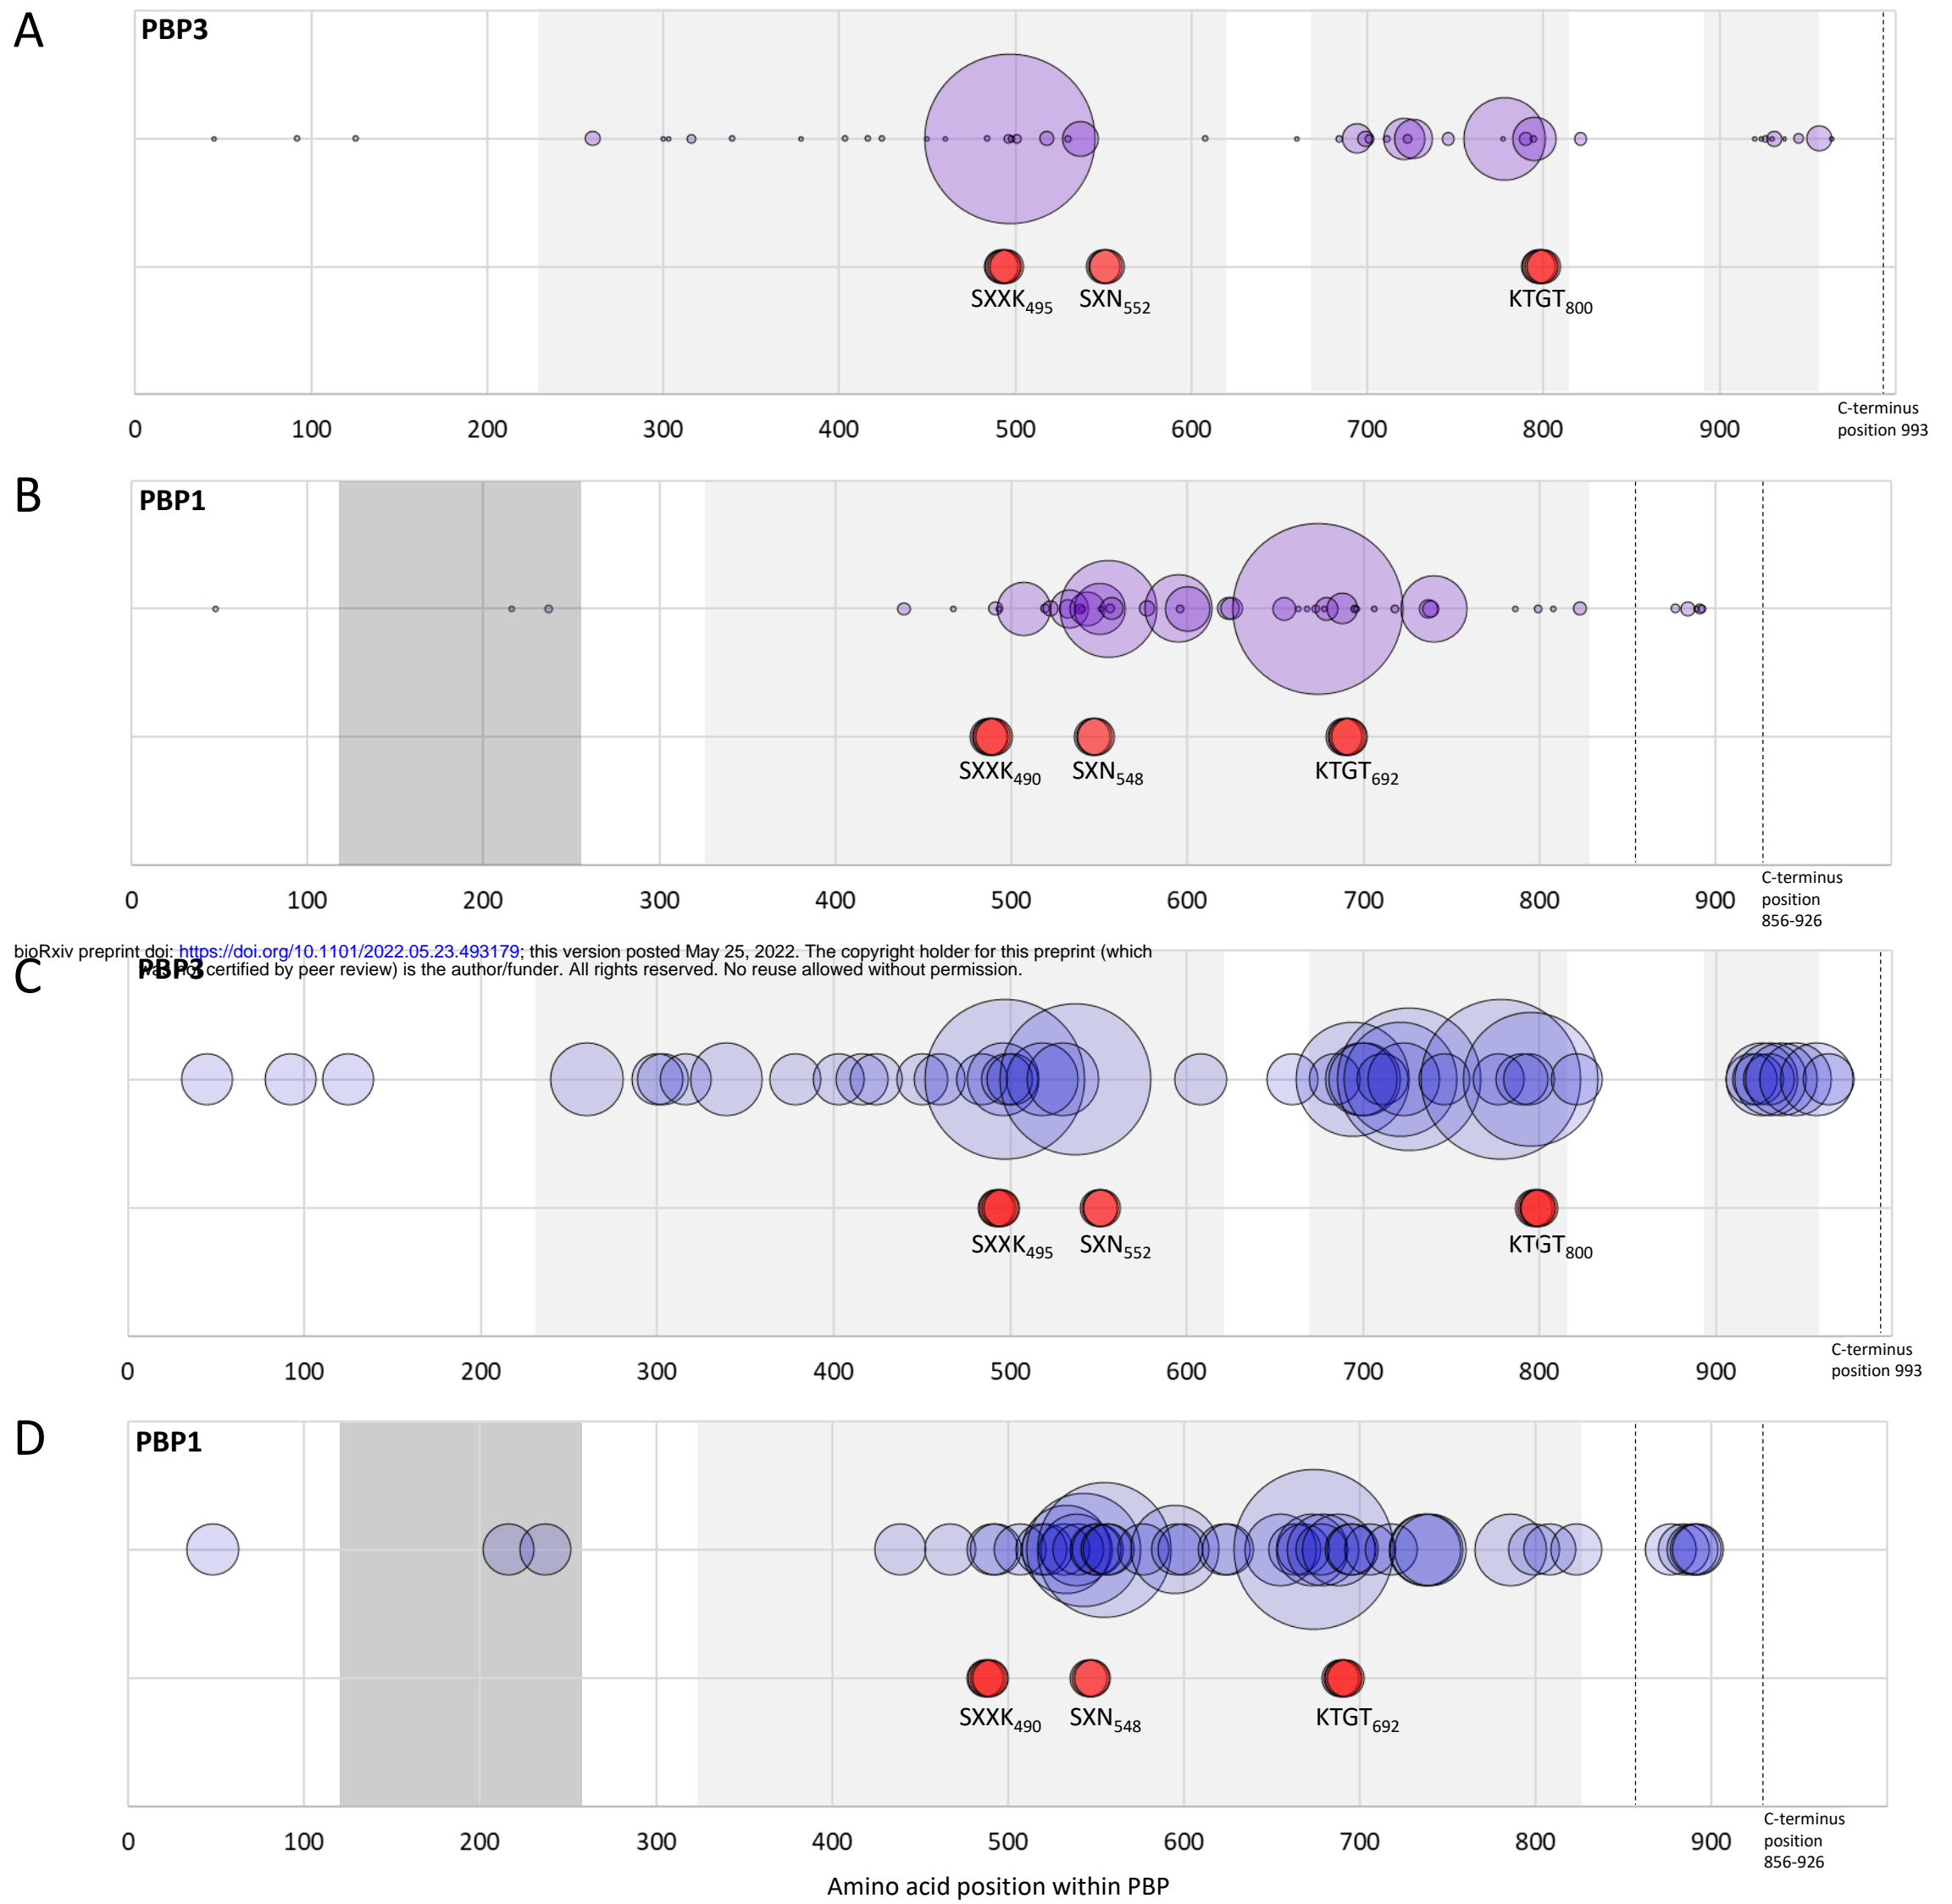

Figure 2

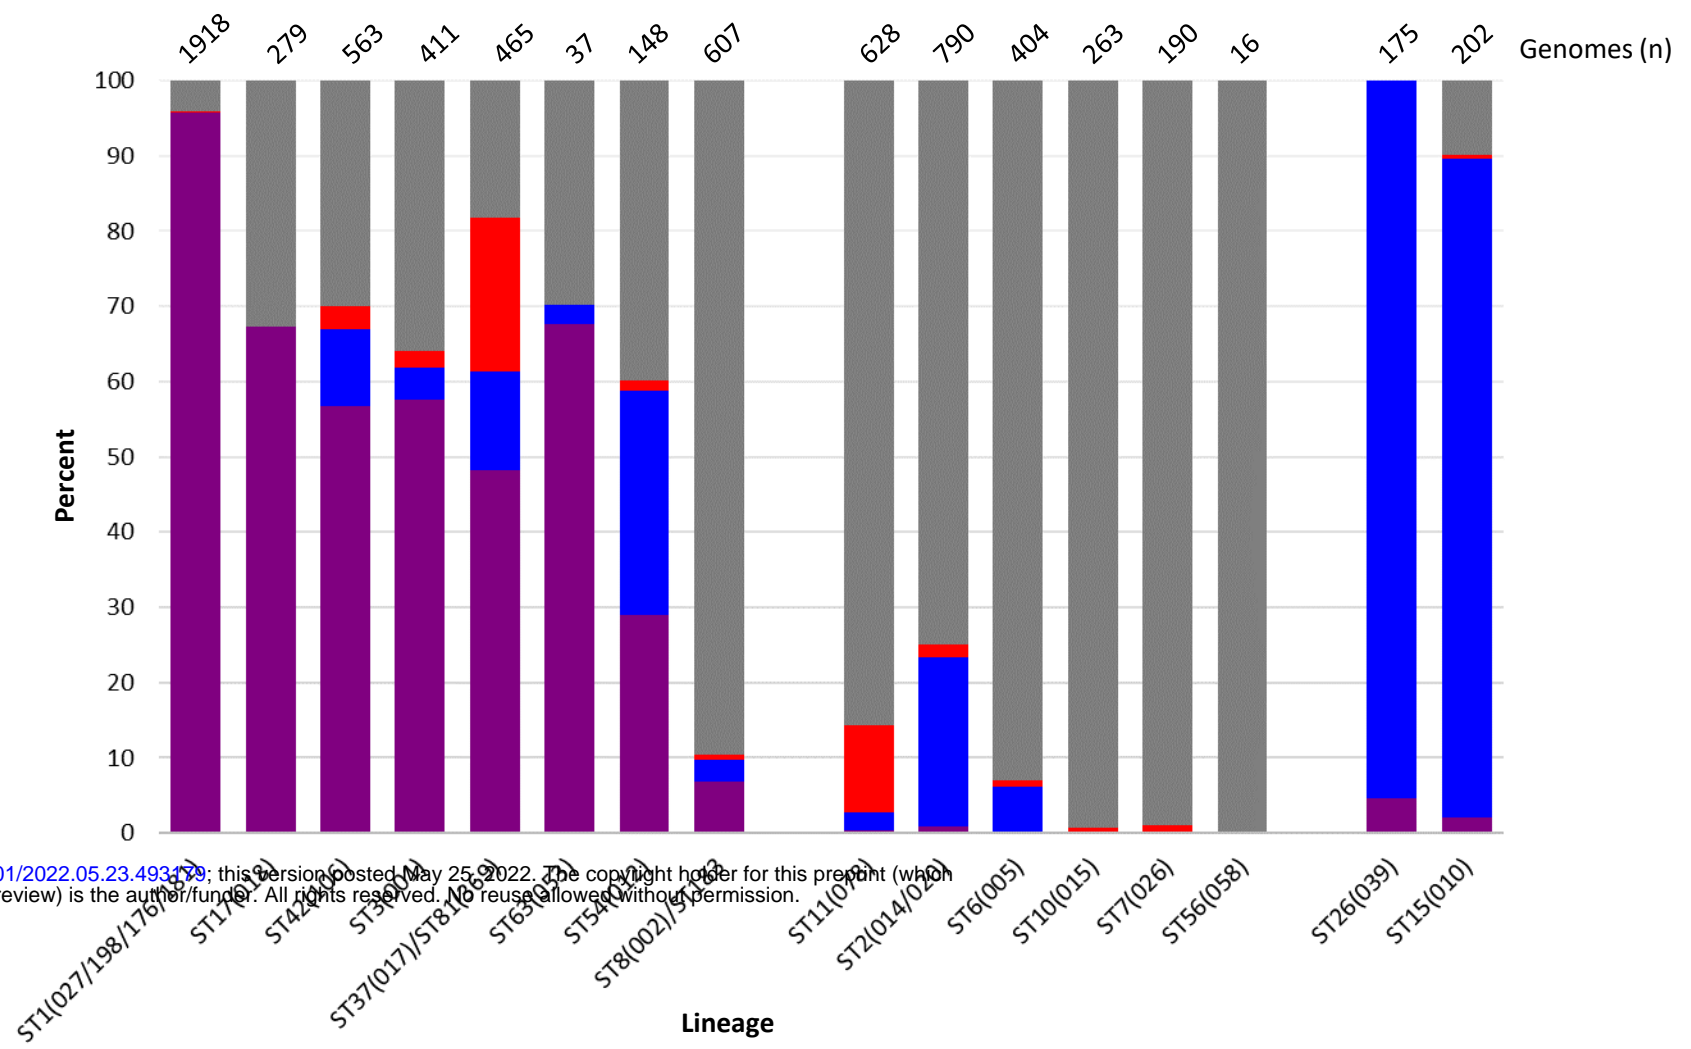

**Legend**

- Co-occurrence of PBP substitution(s) and fluoroquinolone resistance (*gyrA/gyrB* substitution(s))
- PBP substitution(s)
- Fluoroquinolone resistance
- Wild type

Figure 3

A

| Lineage             | Isolate      | Location        | SNPs | PBP Substitutions |             |                   | Cephradine (first) | Cefuroxime (second) | Cefotaxime (third*)                | Ampicillin                         | Co-amoxiclav | Meropenem | Imipenem                        | Piperacillin-tazobactam |
|---------------------|--------------|-----------------|------|-------------------|-------------|-------------------|--------------------|---------------------|------------------------------------|------------------------------------|--------------|-----------|---------------------------------|-------------------------|
|                     |              |                 |      | PBP3              | PBP1        |                   |                    |                     |                                    |                                    |              |           |                                 |                         |
| ST1(027)            | TN145        | Oxfordshire, UK |      | WT                |             | WT                | 72                 | 376                 | 256                                | 2                                  | 2            | 4         | 8                               | 16                      |
| ST1(027)-FQ-R2      | 1421         | Oxfordshire, UK | 30   | V497L             |             | WT                | 239                | 627                 | 284                                | 2                                  | 2            | 8         | 8                               | 16                      |
| ST1(027)-FQ-R2      | 1582         | Oxfordshire, UK | 28   | V497L             |             | T674I             | 239                | 537                 | 284                                | 2                                  | 2            | 16        | 8                               | 32                      |
| ST1(027)-FQ-R2      | 1503a        | Oxfordshire, UK | 29   | V497L             |             | T674I A555T       | 239                | 627                 | 284                                | 2                                  | 2            | 16        | 8                               | 32                      |
| ST1(027)            | OPT_1687     | Calgary, Canada |      | WT                |             | WT                | 72                 | 376                 | 256                                | 2                                  | 2            | 4         | 8                               | 16                      |
| ST1(027) FQ-R1      | OPT_1905     | Columbus, USA   | 20   | A726V             |             | WT                | 143                | 752                 | 365                                | 2                                  | 2            | 8         | 8                               | 32                      |
| ST1(027) FQ-R1      | OPT_2787     | Detroit, USA    | 27   | A726V             |             | A555T             | 143                | 752                 | 512                                | 2                                  | 2            | 8         | 8                               | 16                      |
| ST17(018)           | Oxf79        | Oxfordshire, UK |      | WT                |             | WT                | 36                 | 376                 | 256                                | 1                                  | 1            | 4         | 8                               | 8                       |
| ST17(018)           | OPT_2644     | Italy           | 118  | V497L             | A778V       | I550L K595N T740N | 573                | 1506                | >512                               | 2                                  | 2            | 8         | 16                              | 32                      |
| ST3(001)            | 2915         | Oxfordshire, UK |      | WT                |             | WT                | 36                 | 376                 | 256                                | 1                                  | 1            | 4         | 8                               | 8                       |
| ST3(001)            | Oxf746b      | Oxfordshire, UK | 162  | A778V             |             | WT                | 72                 | 470                 | 284                                | 1                                  | 1            | 4         | 4                               | 8                       |
| ST3(001)            | 1172-p1      | Oxfordshire, UK | 273  | V497L             |             | WT                | 143                | 752                 | 284                                | 1                                  | 1            | 4         | 8                               | 8                       |
| ST3(001)            | OPT_2456     | Germany         | 134  | V497L             | A778V       | T600I A507T       | 239                | 1506                | 512                                | 1                                  | 1            | 4         | 16                              | 8                       |
| ST42(106)           | Oxf1499      | Oxfordshire, UK |      | WT                |             | WT                | 72                 | 376                 | 256                                | 2                                  | 1            | 4         | 8                               | 16                      |
| ST42(106)           | L,15.7921787 | Leeds, UK       | 20   | V497L             |             | T674I             | 143                | 376                 | 256                                | 2                                  | 2            | 8         | 8                               | 16                      |
| <b>Isolates (n)</b> |              |                 |      | <b>PBP3</b>       | <b>PBP1</b> |                   |                    |                     |                                    |                                    |              |           |                                 |                         |
| ST10(005)           | 11           | UK              | N/A  | WT                |             | WT                | NT                 | 128                 | 128                                | 0.5 <sup>1</sup> , 1 <sup>10</sup> | 1            | 8         | 4                               | 8                       |
| ST6(005)            | 10           | UK              | N/A  | WT                |             | WT                | NT                 | 128                 | 128                                | 1                                  | 1            | 8         | 4                               | 8                       |
| ST56(058)           | 4            | UK              | N/A  | WT                |             | WT                | NT                 | 128                 | 128                                | 1                                  | 1            | 8         | 4                               | 8                       |
| ST7(026)            | 5            | UK              | N/A  | WT                |             | WT                | NT                 | 128                 | 64 <sup>3</sup> , 128 <sup>2</sup> | 0.5 <sup>1</sup> , 1 <sup>10</sup> | 1            | 8         | 2 <sup>2</sup> , 4 <sup>3</sup> | 8                       |

bioRxiv preprint doi: <https://doi.org/10.1101/2022.05.23.493179>; this version posted May 25, 2022. The copyright holder for this preprint (which was not certified by peer review) is the author/funder. All rights reserved. No reuse allowed without permission.

\*An additional third generation cephalosporin was tested, ceftazidime, all isolates MIC 128µg/ml.

B

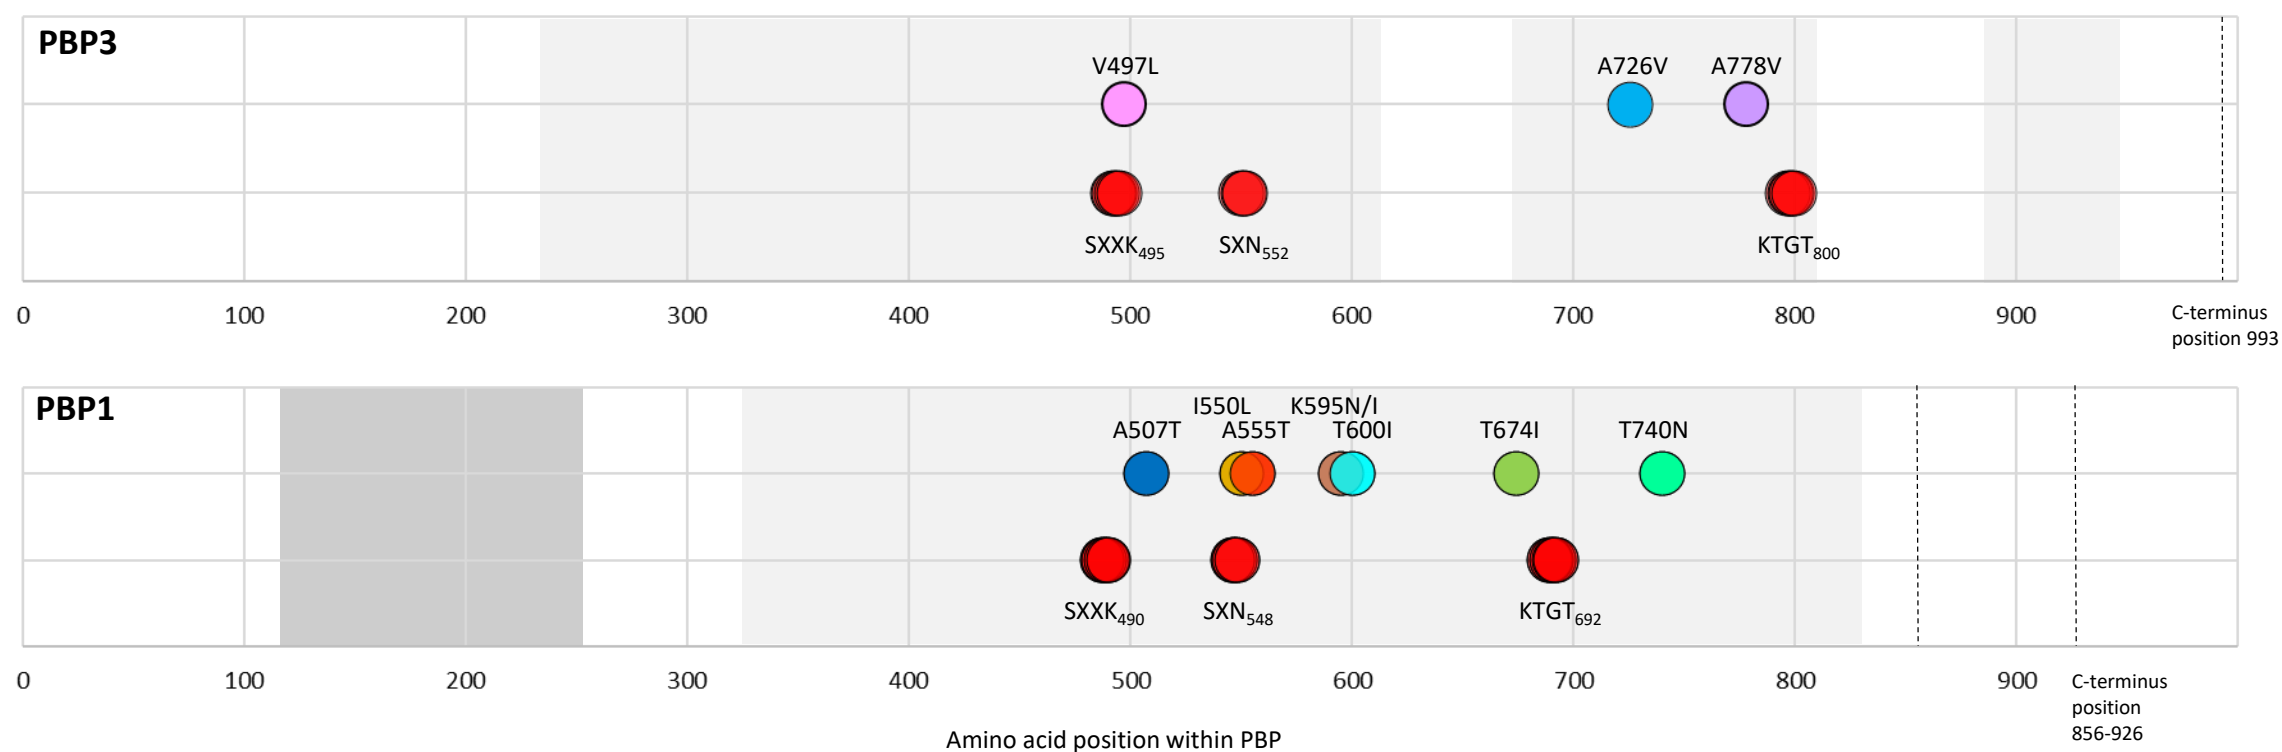

Figure 4

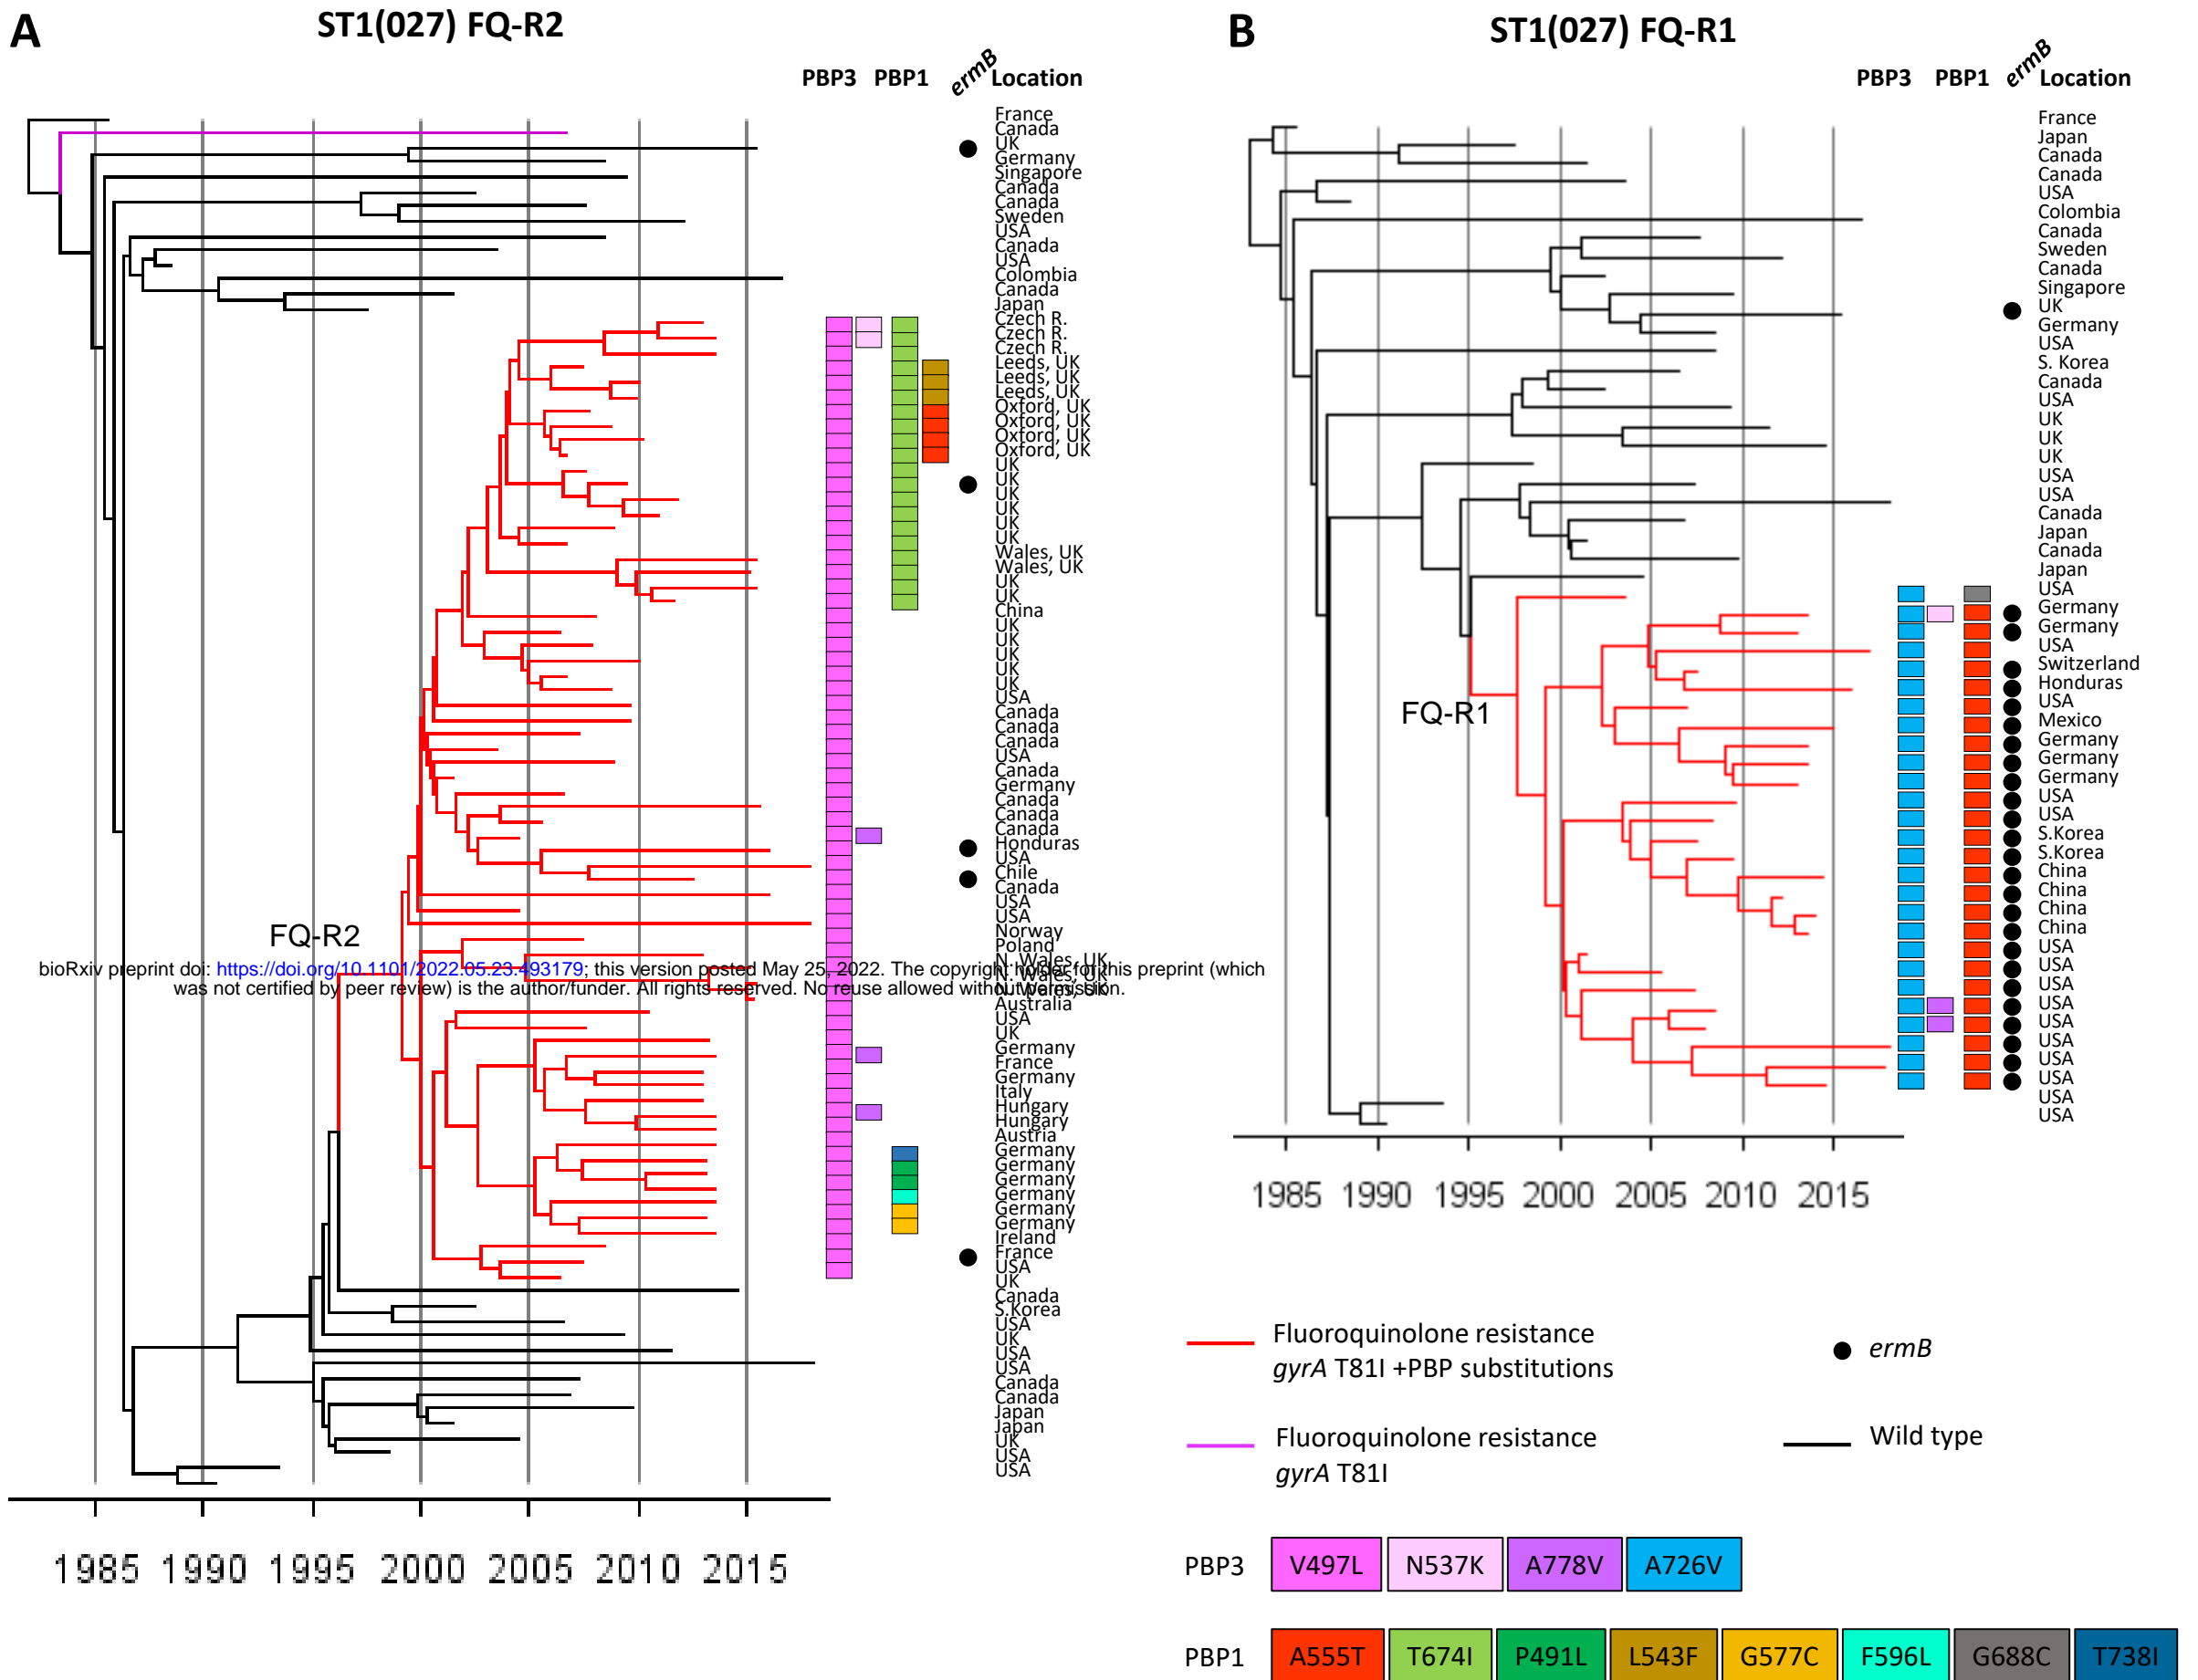

Figure 5

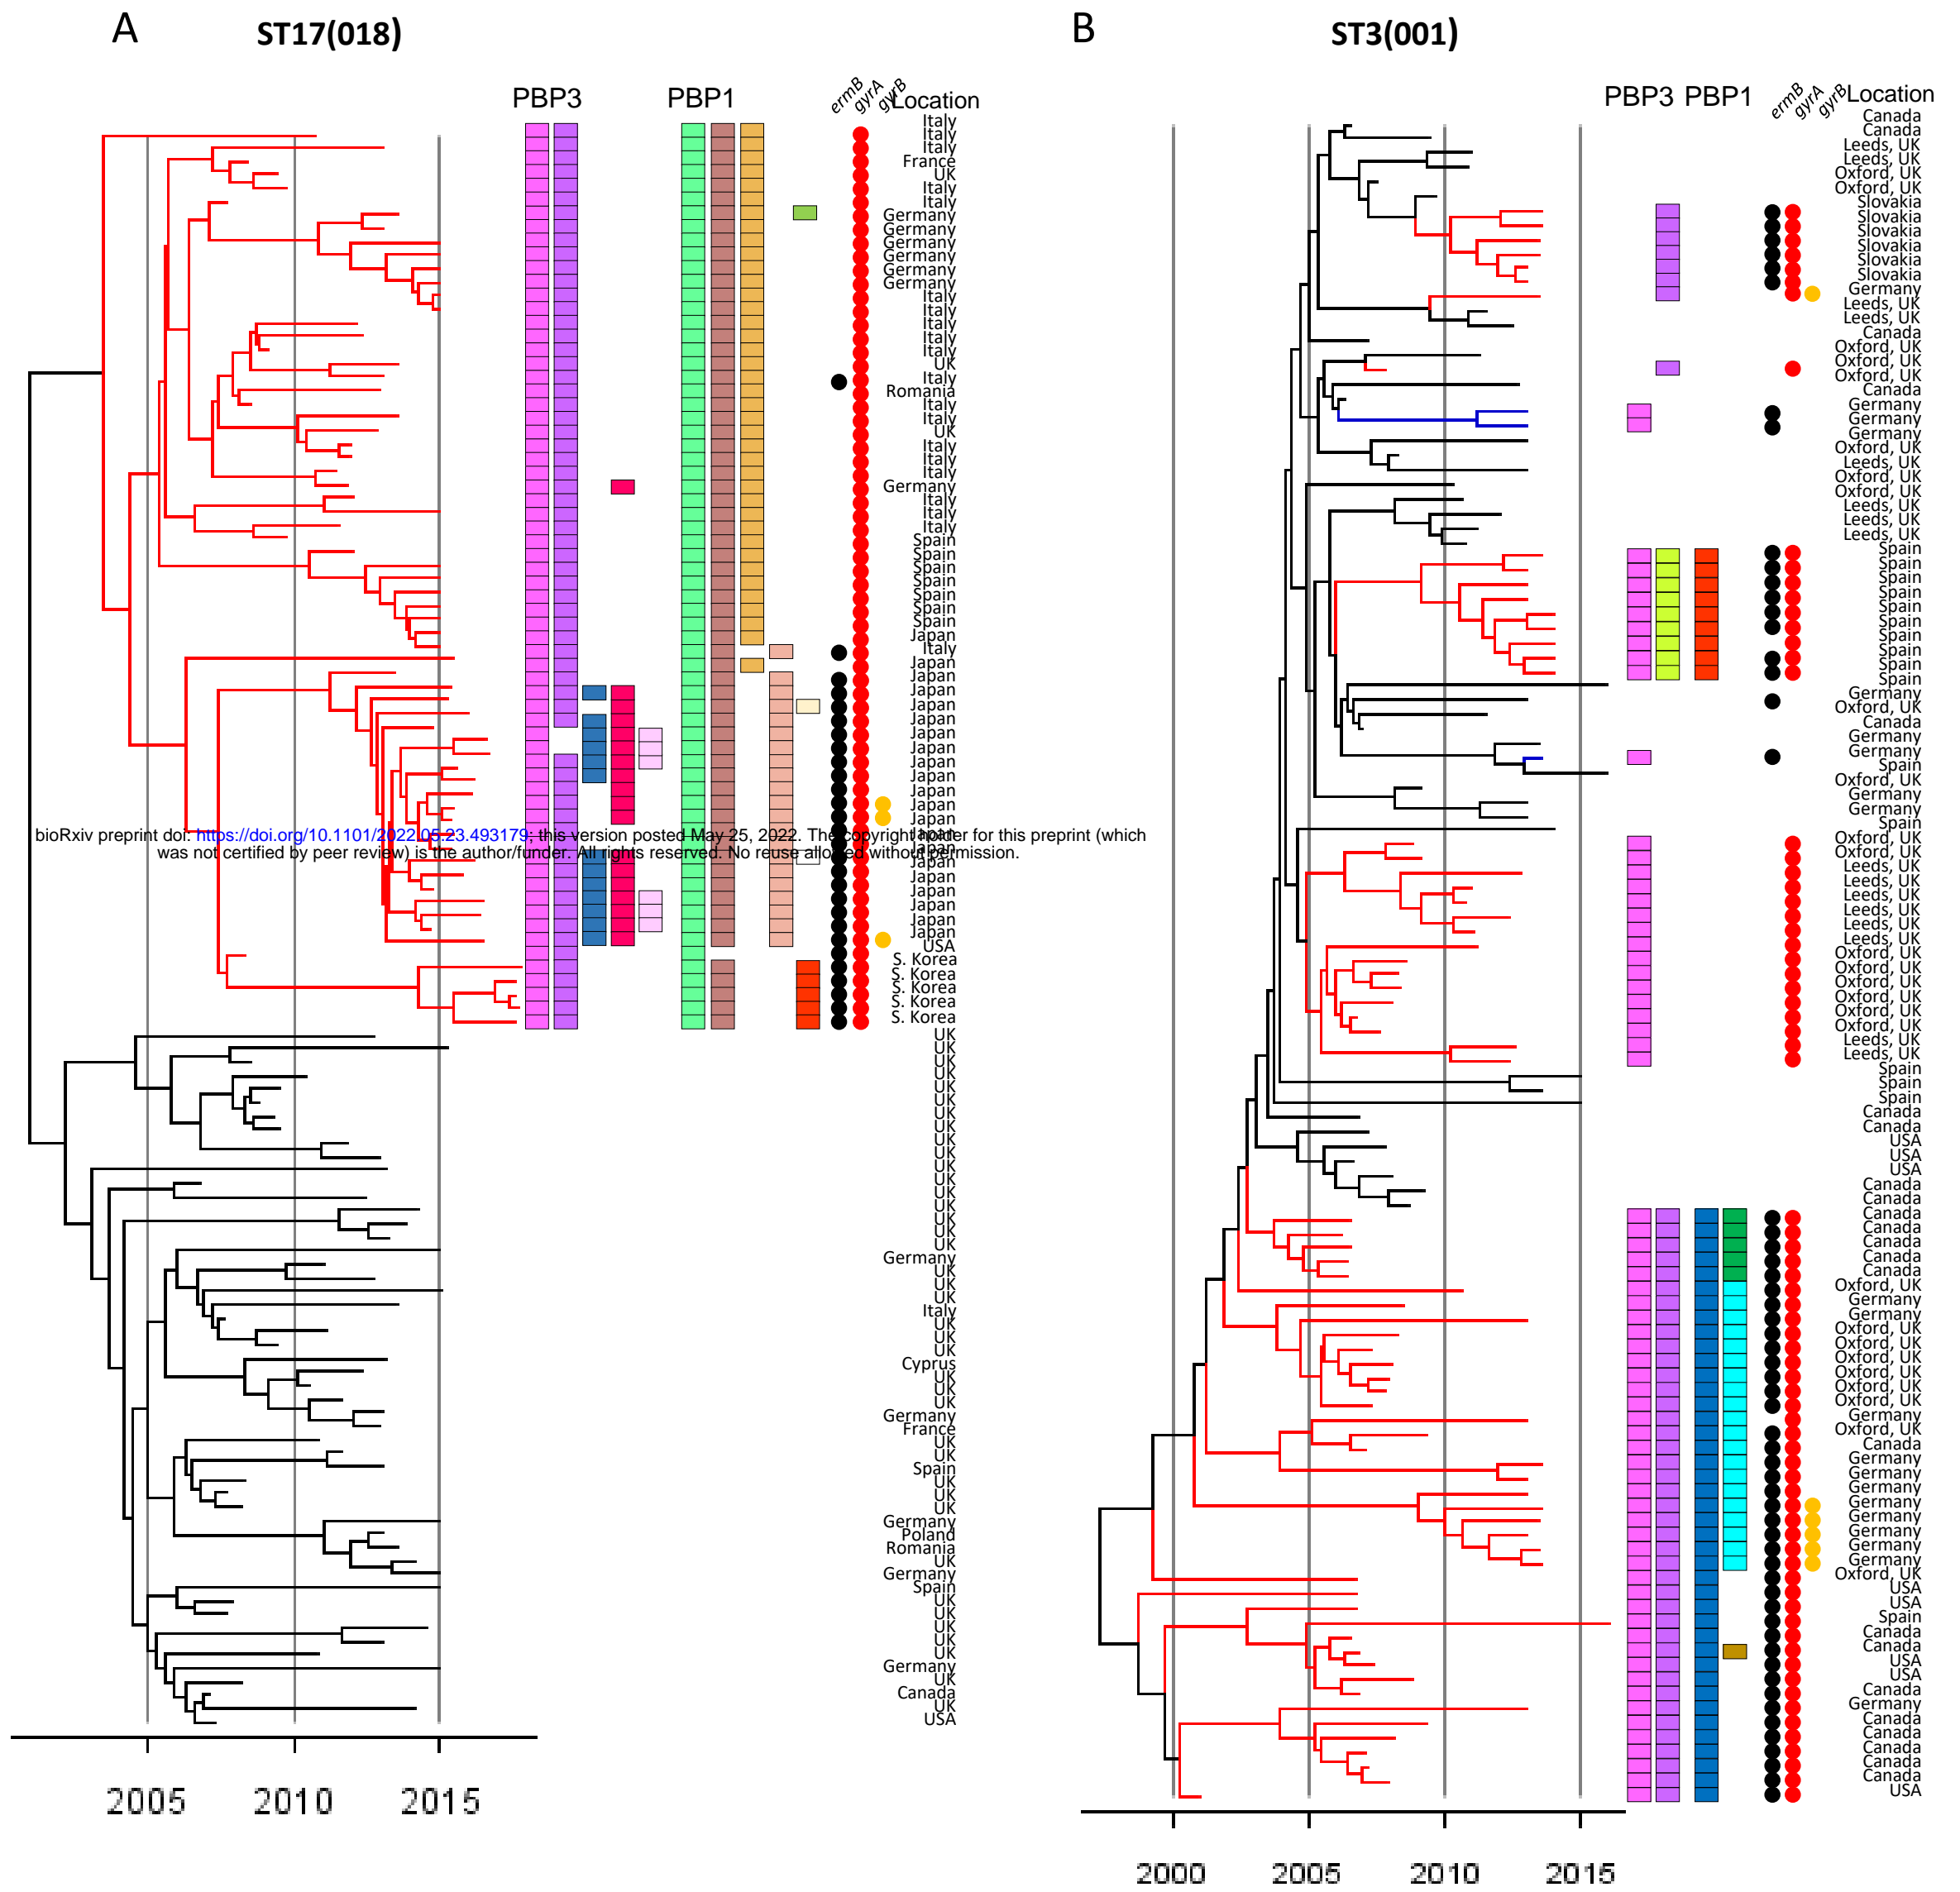

— Fluoroquinolone resistance  
*gyrA* T81I/V and/or *gyrB* D426N  
 +PBP substitutions

— Fluoroquinolone susceptible  
 +PBP substitutions

— Wild type

● *ermB*  
 ● *gyrA* T81I  
 ● *gyrB* D426N

|      |       |       |       |       |       |         |       |       |       |       |
|------|-------|-------|-------|-------|-------|---------|-------|-------|-------|-------|
| PBP3 | V497L | N537K | A778V | A694V | G957E | P931L/I |       |       |       |       |
| PBP1 | A555T | T674I | L543F | K595N | A507T | T600I   | T740N | A786V | G533S | A493T |
|      |       | T674N |       |       |       |         |       |       |       |       |



Figure 6

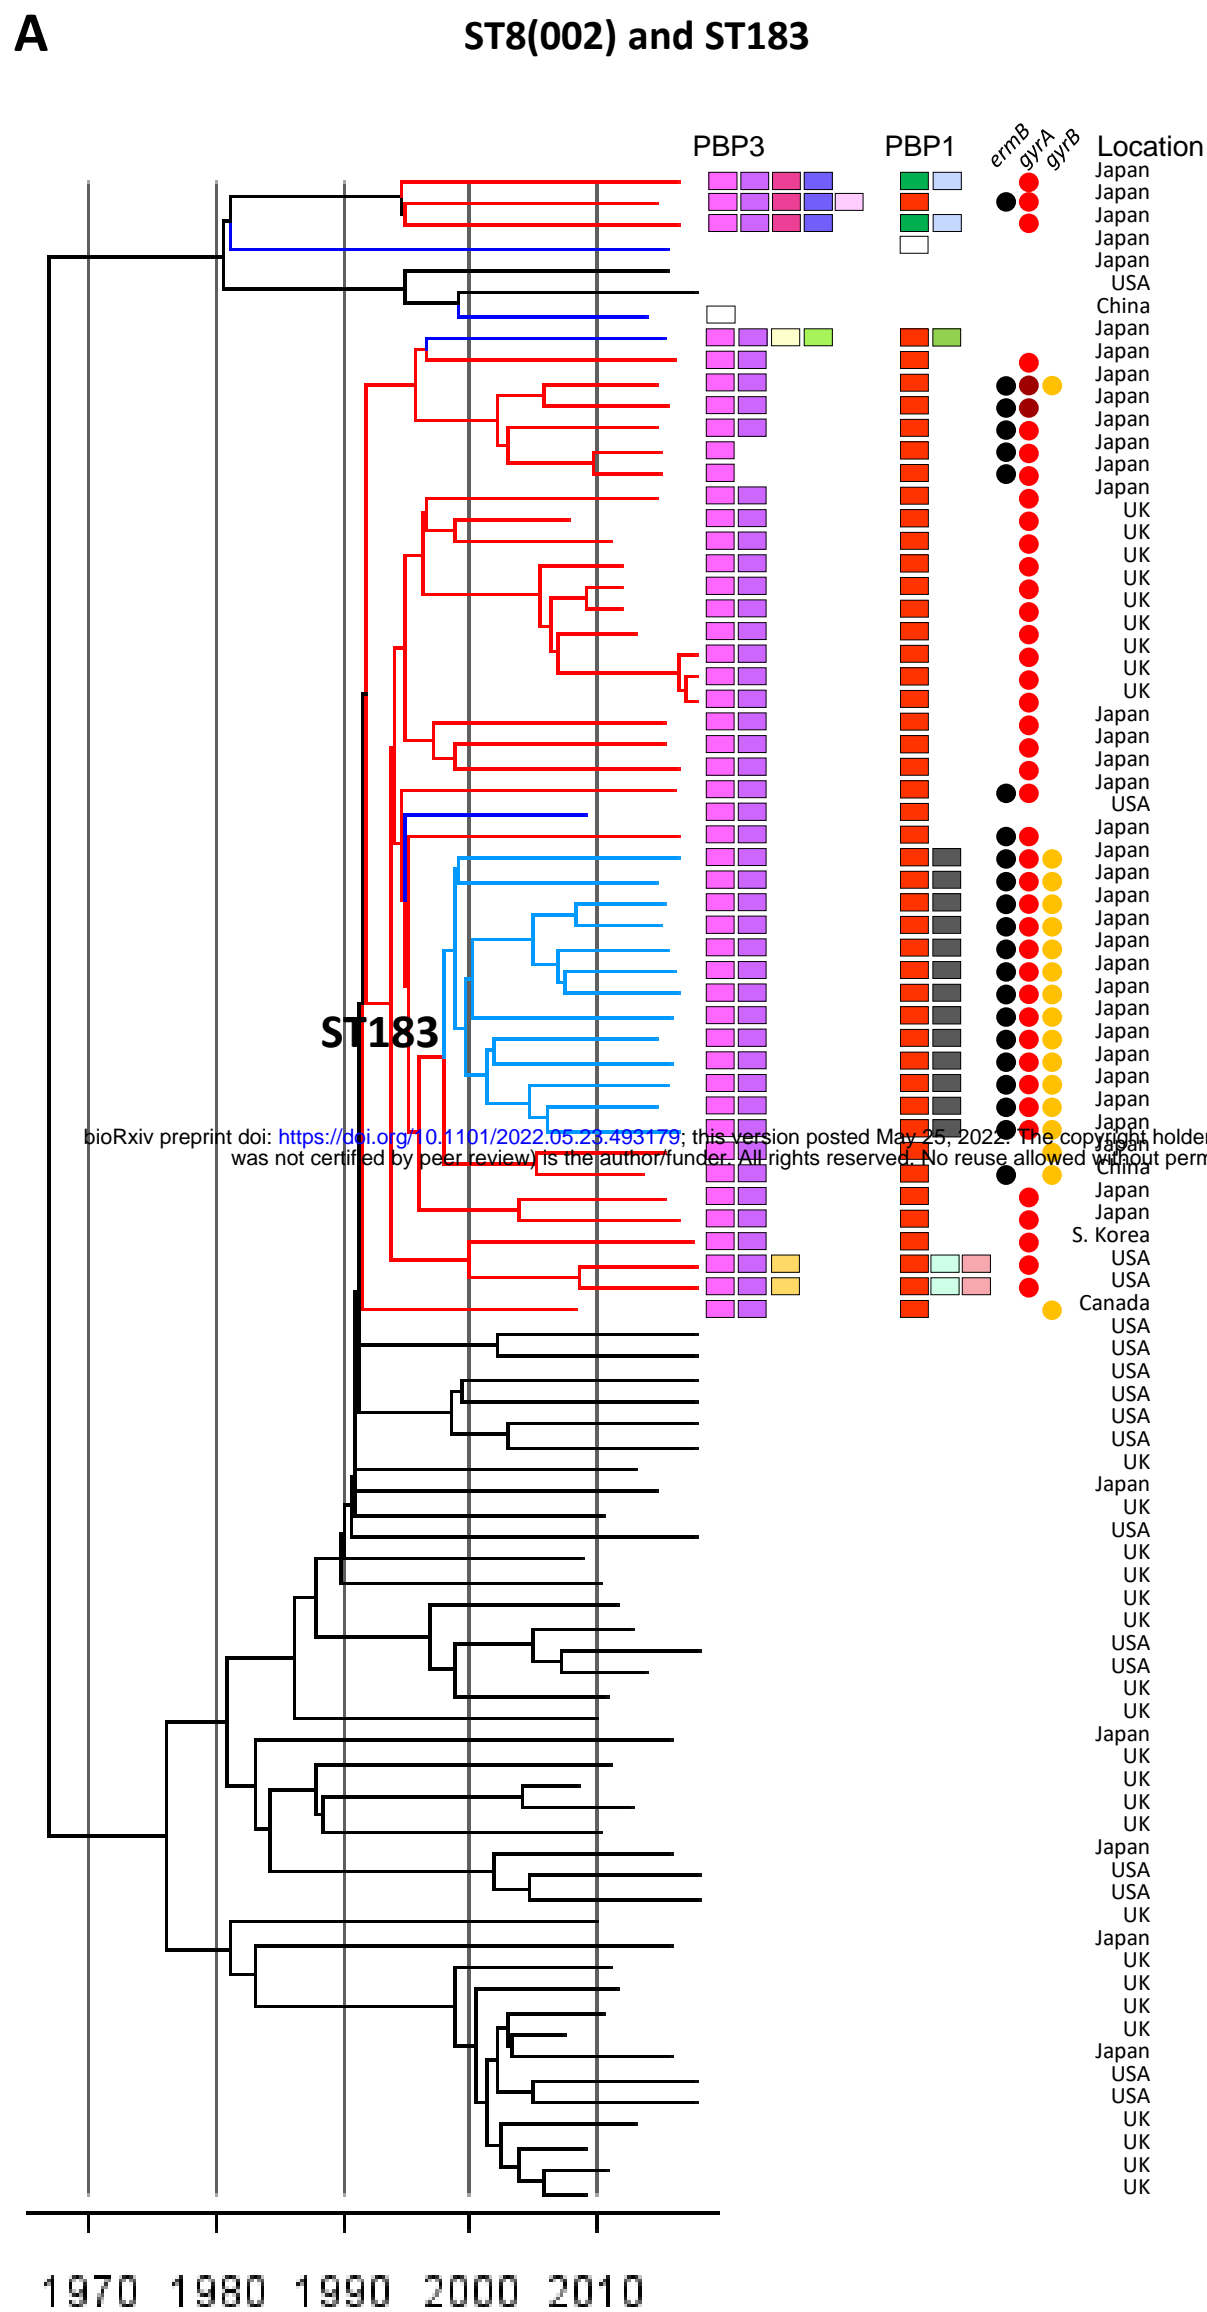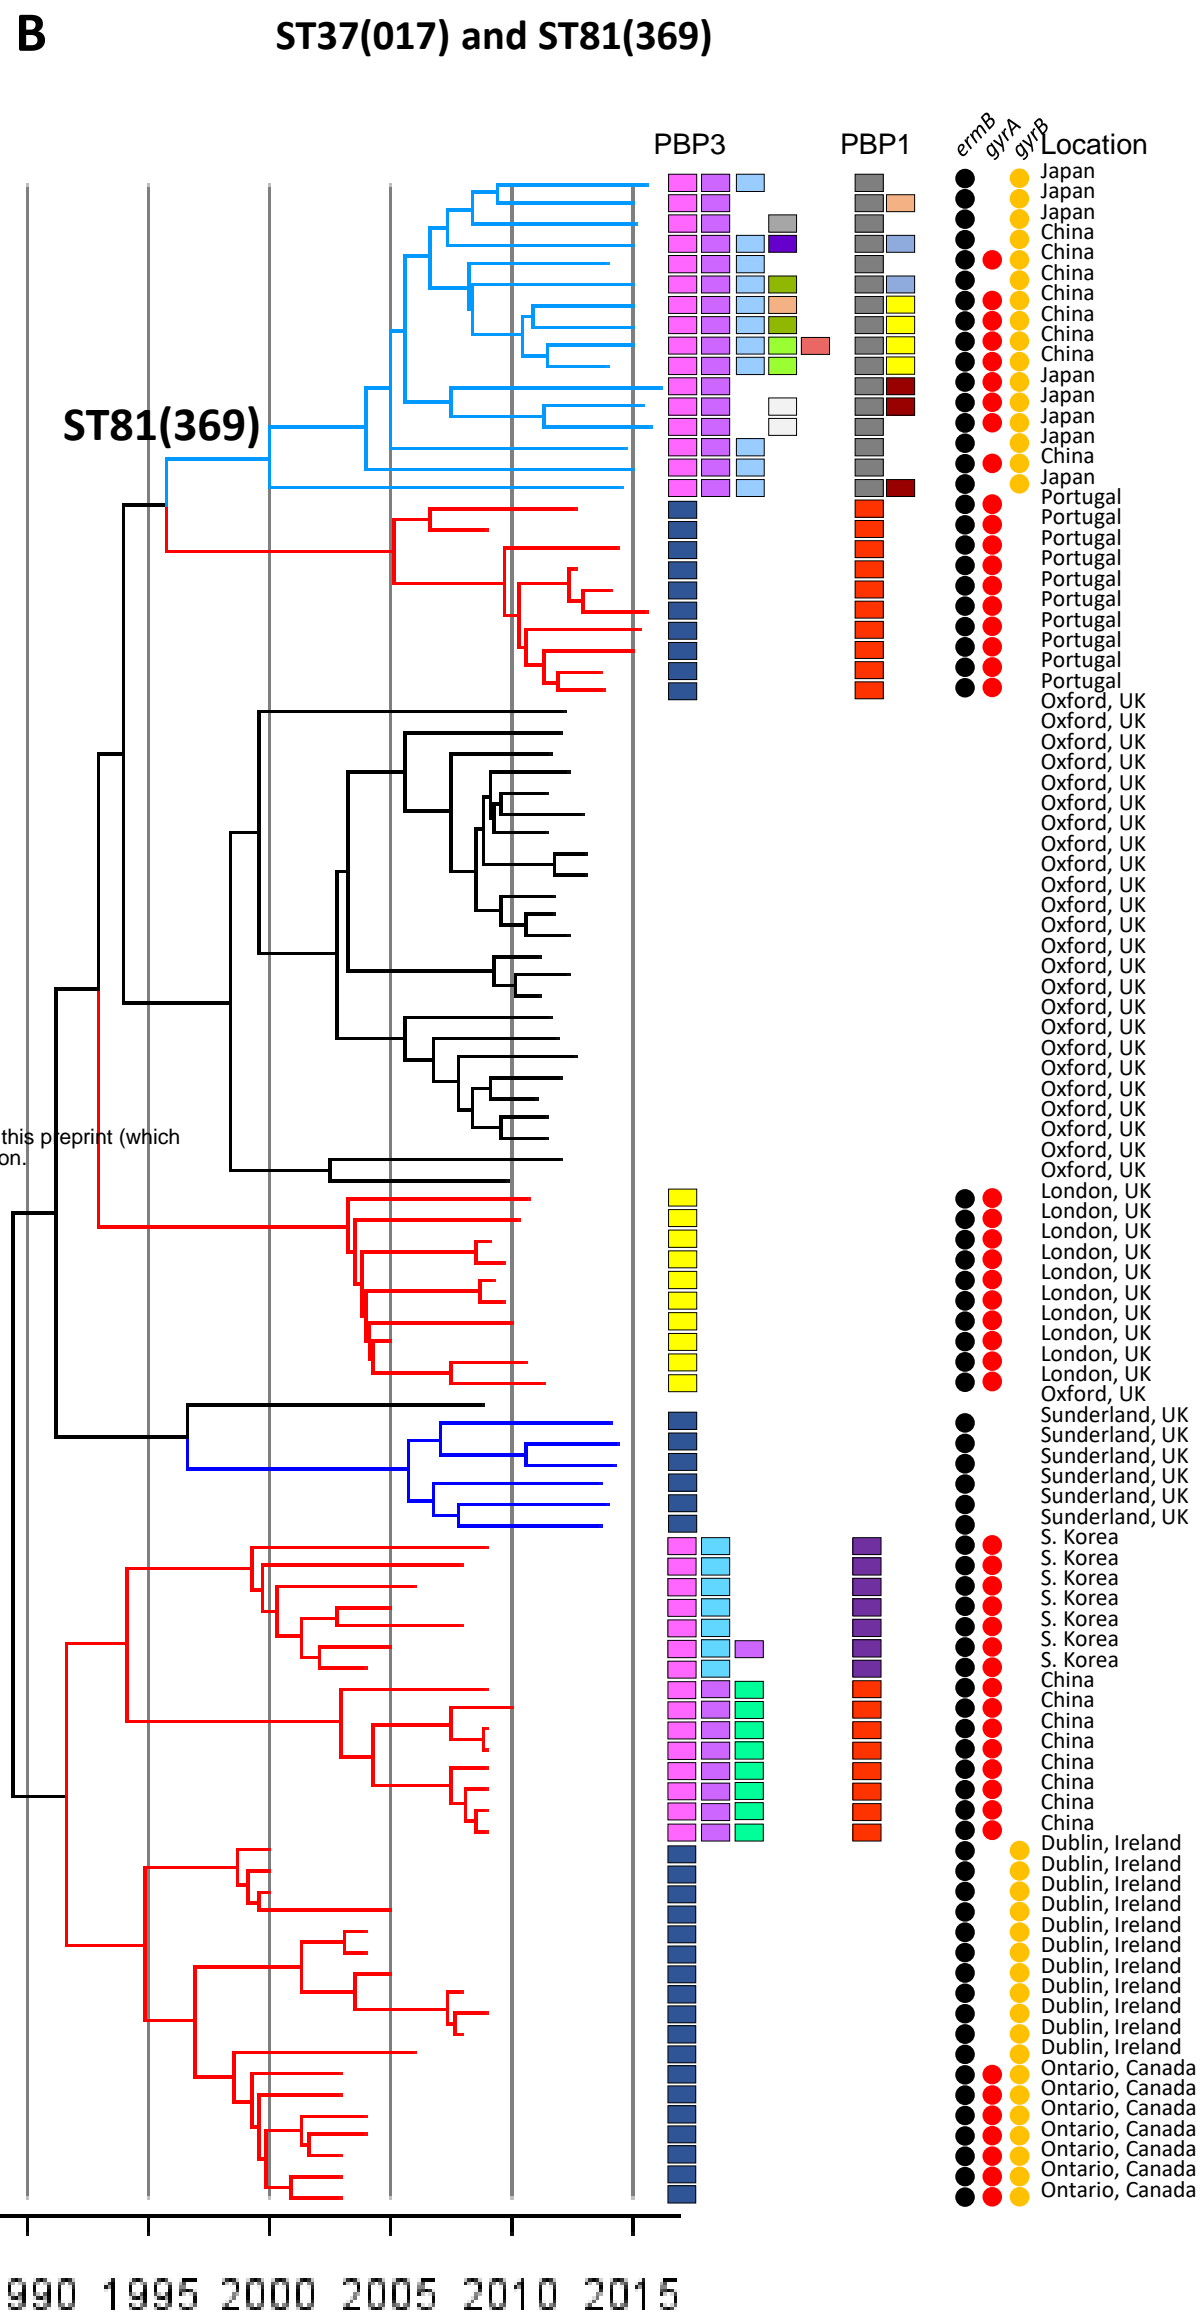

bioRxiv preprint doi: <https://doi.org/10.1101/2022.05.23.493179>; this version posted May 25, 2022. The copyright holder for this preprint (which was not certified by peer review) is the author/funder. All rights reserved. No reuse allowed without permission.

— Wild type

— ST8(002) or ST37(017)  
Fluoroquinolone resistant  
*gyrA* T81I/V and/or *gyrB* D426N plus  
PBP substitutions

— Fluoroquinolone  
susceptible  
+PBP substitutions

— ST183 or ST81; fluoroquinolone  
resistance plus PBP substitutions

● *gyrA* T81I ● *gyrB* D426N

● *gyrA* T81V ● *ermB*

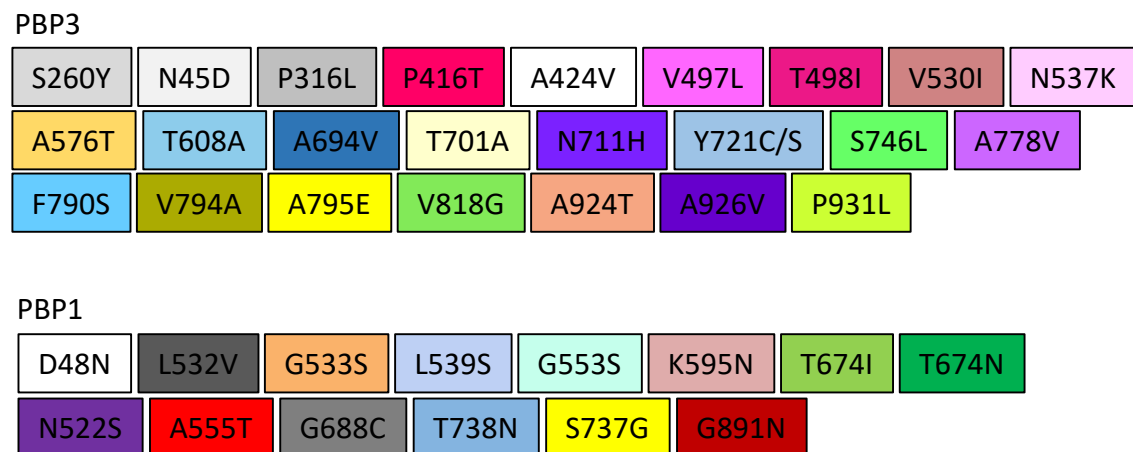



Figure 7

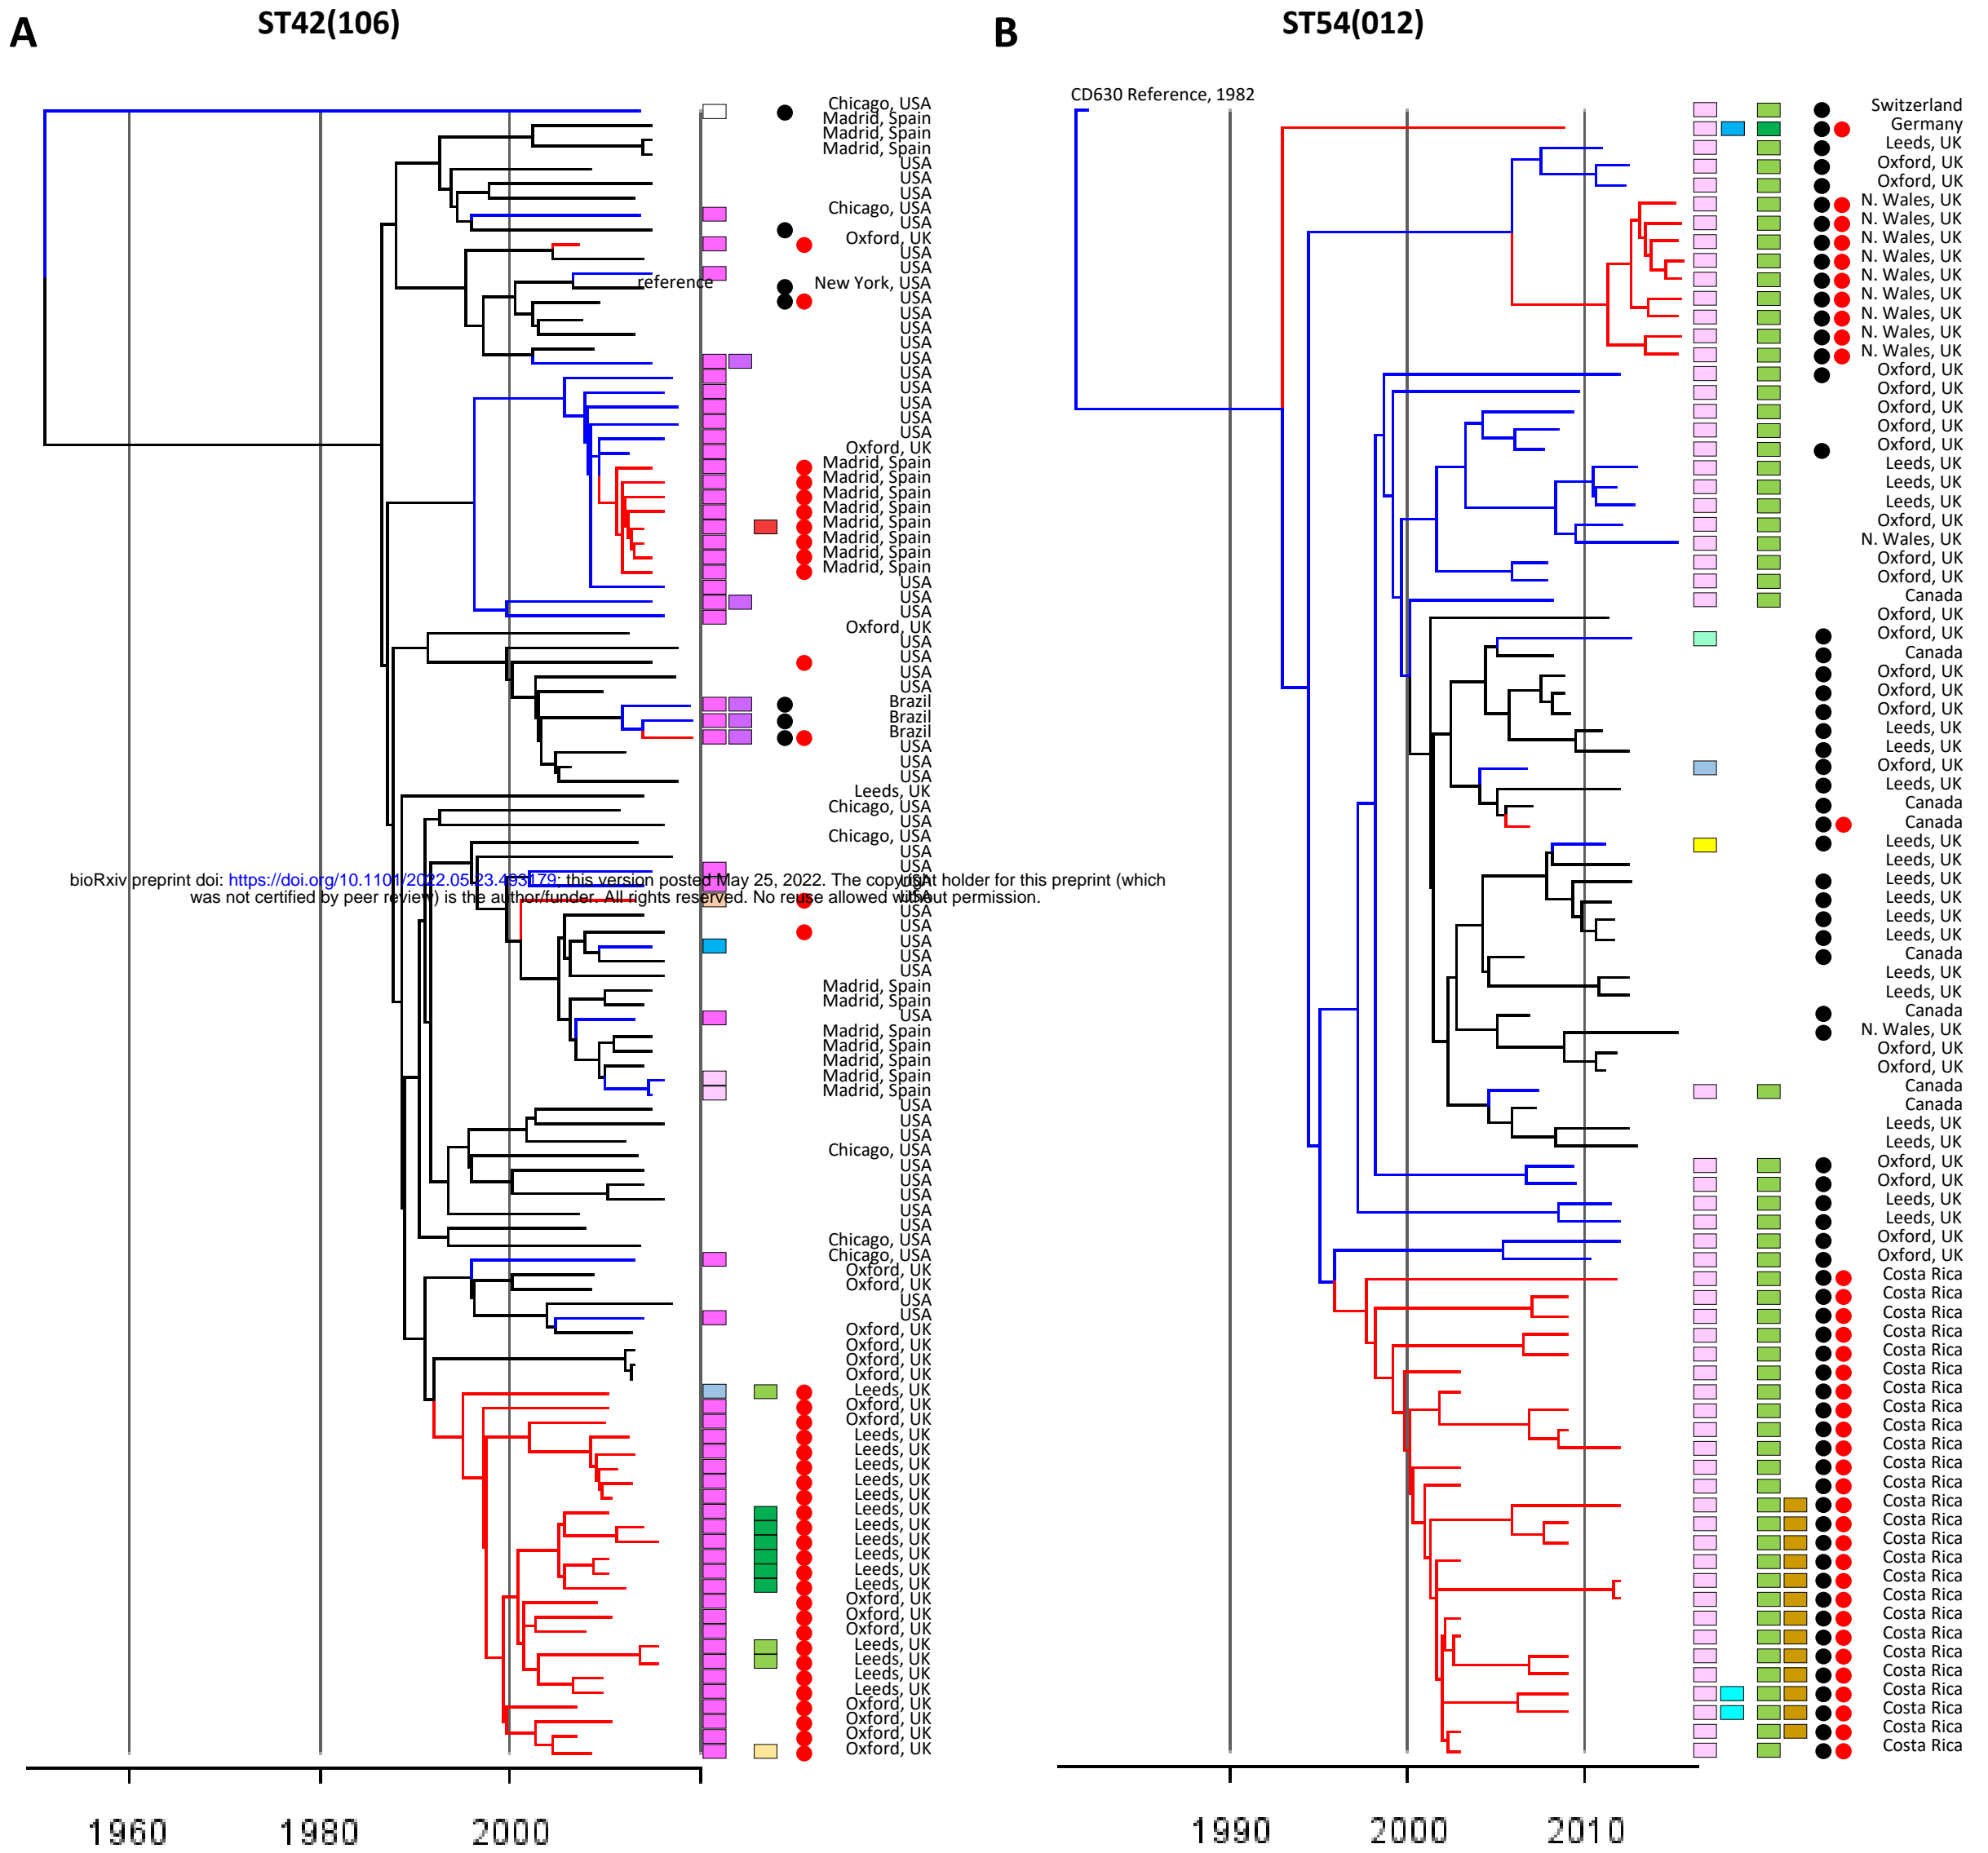

— Fluoroquinolone resistance  
*gyrA* T81I/V +PBP substitutions

● *ermB*  
● *gyrA* T81I

— Fluoroquinolone susceptible  
+PBP substitutions

— Wild type

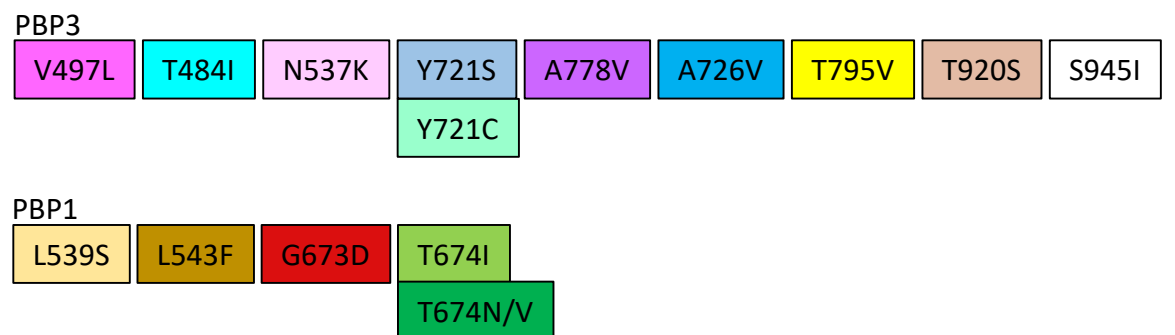

Figure 8

ST2(014/020)

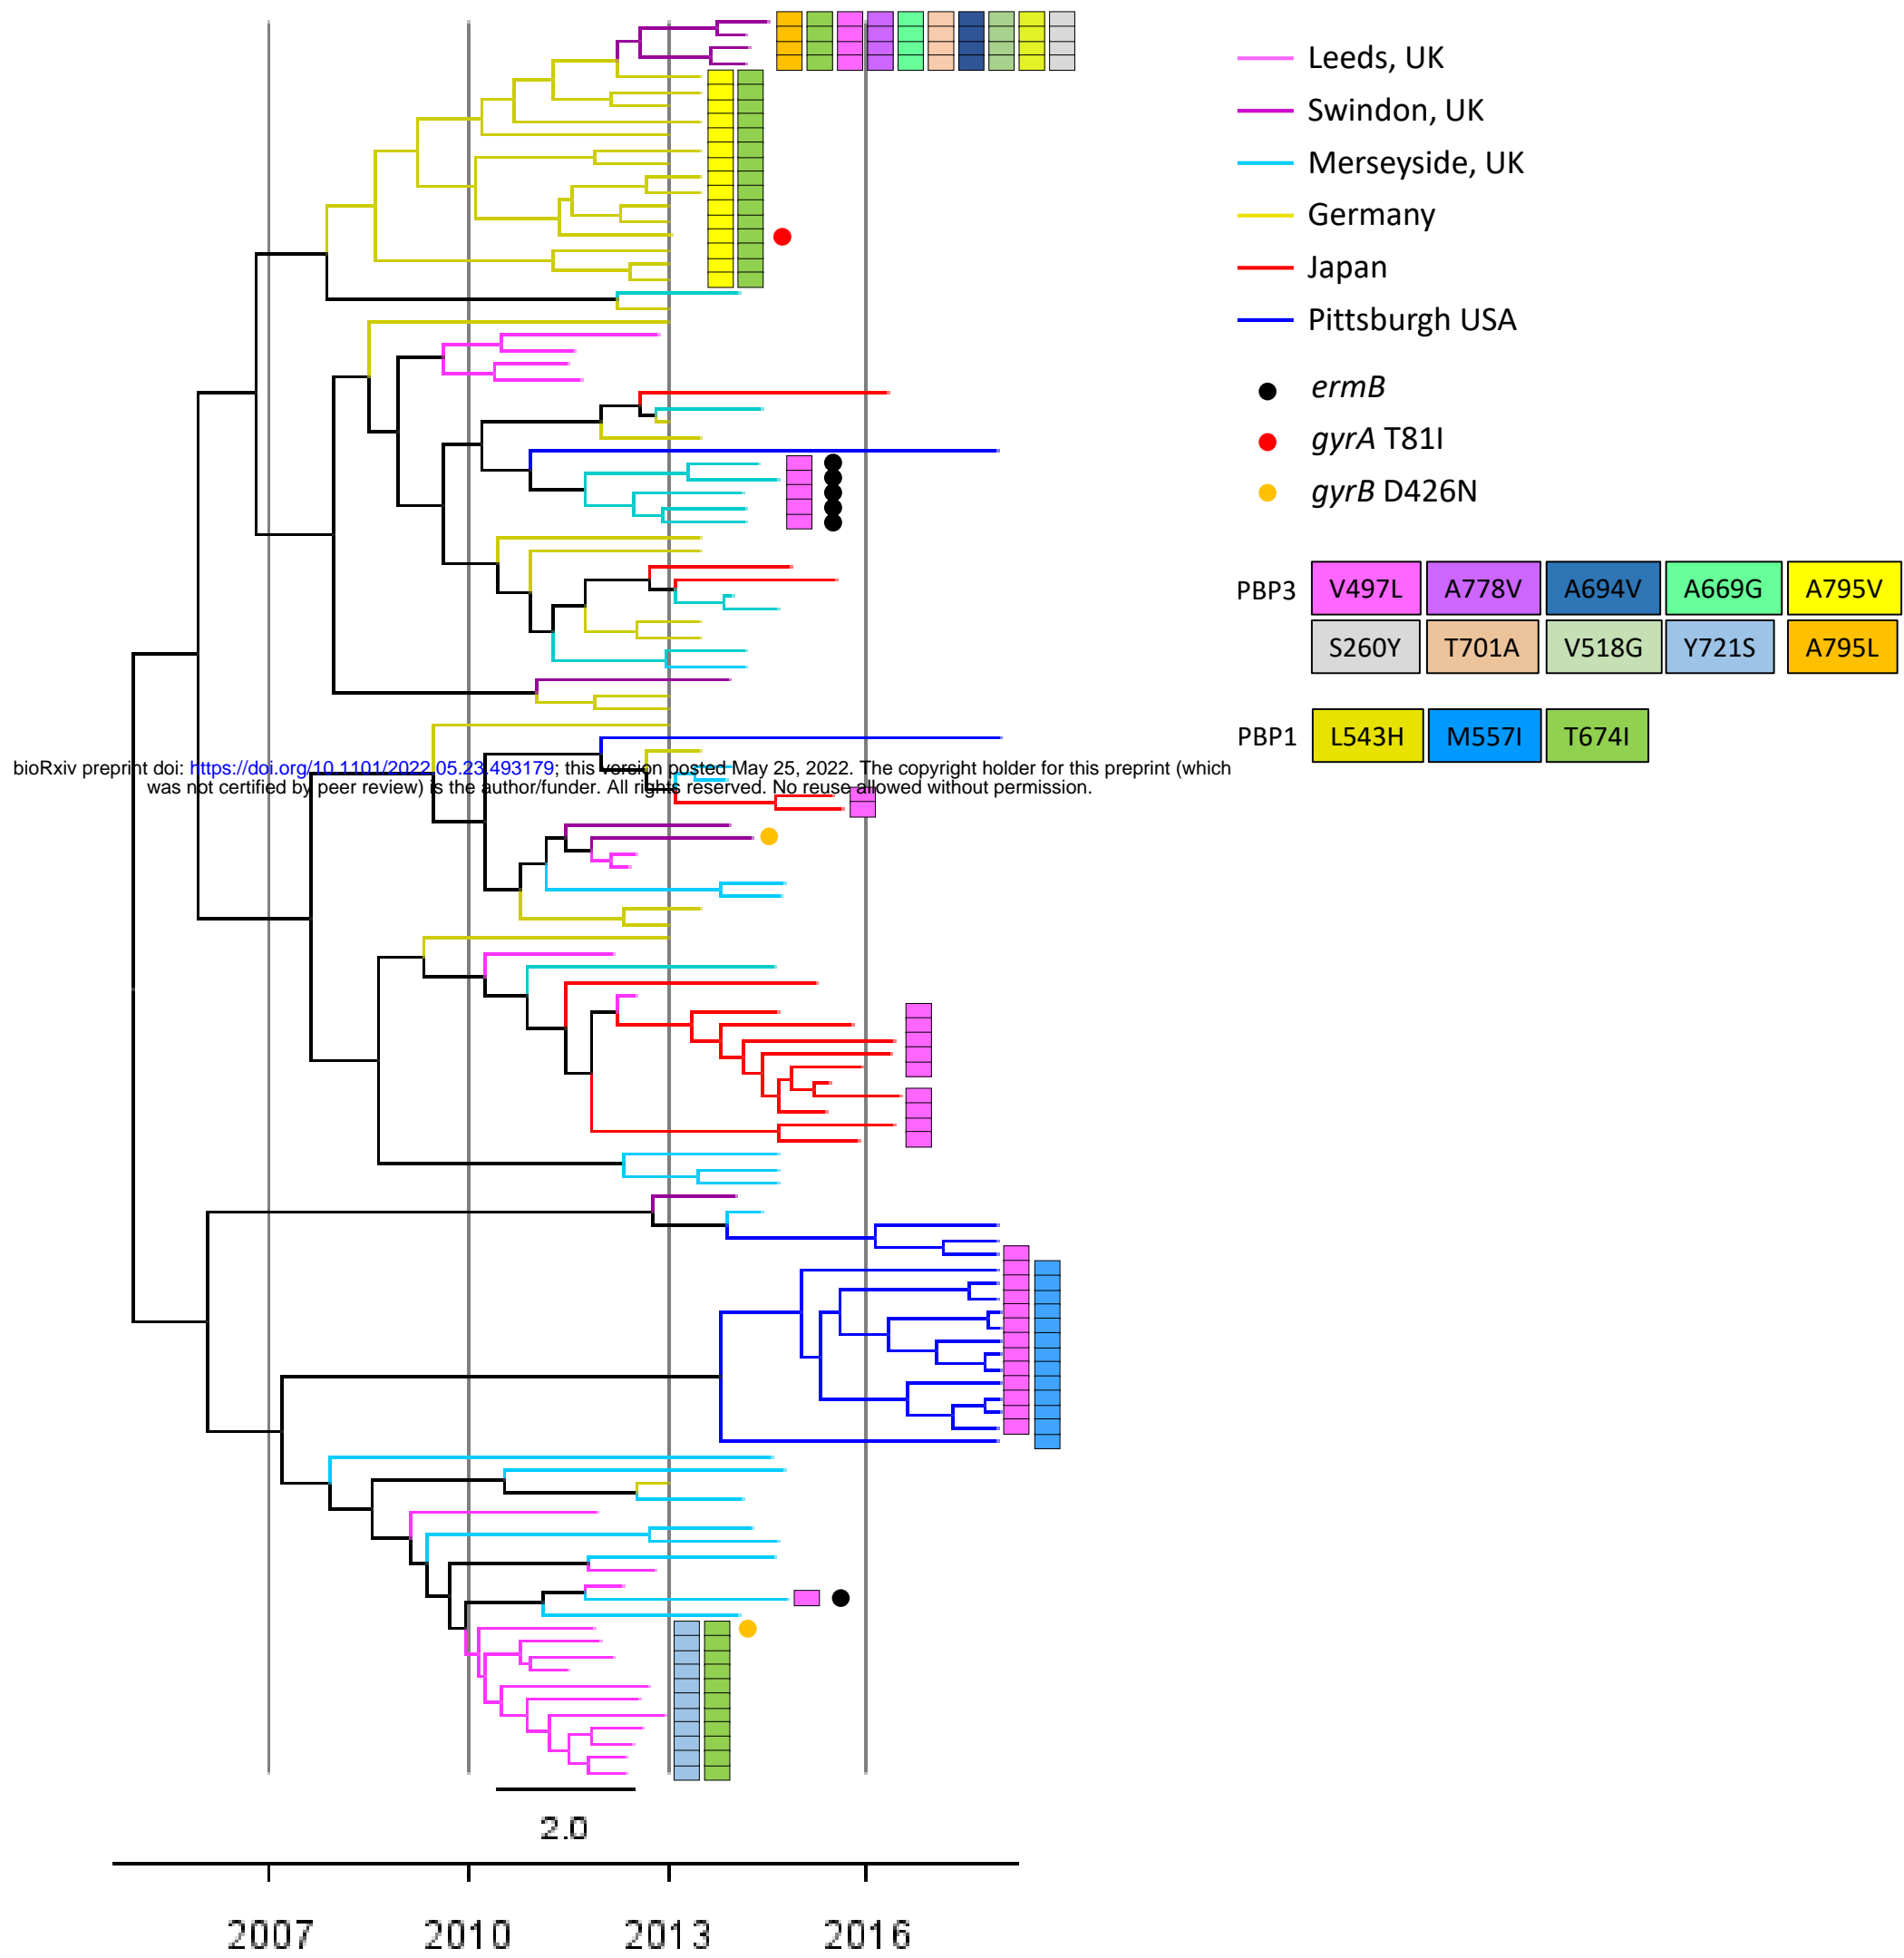

Source: http://biorxiv.org/content/10.1101/2022.05.23.493179v1.full.pdf
